# Supplementary material
Source: PubMed Central journal article supplement (PMC4486257)
Supplement: NIHMS686418-supplement-2.pdf [file NIHMS686418-supplement-2.pdf]

| Transcript/Rc | Annotation/Divergence           | logFC      | FDR                 |
|---------------|---------------------------------|------------|---------------------|
| NM_011198     | Ptgs2 COX2 Cox-2 PGHS-2 PH      | 3.91448133 | 8.11E-12            |
| NM_008036     | Fosb - - 7 A2-B1 7 9.56 cM pr   | 3.82043783 | 0                   |
| NM_001101     | Gm4984 AI428901 EG245347        | 3.708546   | 5.91E-10            |
| NM_010516     | Cyr61 AI325051 CCN1 Igf1bp10    | 3.33475176 | 3.92E-138           |
| NM_020596     | Egr4 NGF1-C NGFI-C NGFIC p/     | 3.26846618 | 4.44E-59            |
| NM_001276     | Arc Arc3.1 C86064 arg3.1 mA     | 3.18455061 | 1.15E-67            |
| NM_010637     | Klf4 EZF Gklf Zie RP23-322L22   | 3.10393574 | 2.06E-60            |
| NM_010444     | Nr4a1 GFRP1 Gfrp Hbr-1 Hbr1     | 3.08879378 | 0                   |
| NM_013628     | Pcsk1 Nec-1 Nec1 PC1 PC3 PI     | 3.05810345 | 0                   |
| NM_007570     | Btg2 AA959598 APRO1 Pc3 TI      | 3.00738991 | 1.45E-169           |
| NR_029794     | Mir212 Mirn212 mmu-mir-212      | 2.99586044 | 0.00071213          |
| NM_007913     | Egr1 A530045N19Rik ETR103       | 2.87470001 | 1.89E-276           |
| NM_001001     | Itrip1 4833424O12Rik DANGEF     | 2.86153165 | 2.86E-103           |
| NM_010234     | Fos D12Rfj1 c-fos cFos - 12 D   | 2.85085891 | 2.25E-254           |
| NM_025274     | Dppa5a AA536857 Dppa5 Esg       | 2.81877104 | 0.0003211           |
| NM_153553     | Npas4 LE-PAS Nxf - 19 A 19 f    | 2.76397668 | 0                   |
| NM_009398     | Tnfrsf18 TSG-6 Tnfrsf18 RP      | 2.75174338 | 4.30E-67            |
| NR_029546     | Mir132 Mirn132 mmu-mir-132      | 2.69873591 | 0.00023127          |
| NM_011817     | Gadd45g AI327420 C86281 CF      | 2.66556627 | 1.84E-47            |
| NM_008655     | Gadd45b AI323528 Myd118 -       | 2.59050397 | 2.47E-59            |
| NM_016789     | Nptx2 Narp np2 - 5 G2 5 84.5    | 2.56613233 | 1.05E-96            |
| NM_007498     | Atf3 LRG-21 - 1 H6 1 96.28 cM   | 2.56424509 | 3.58E-46            |
| NM_178892     | Tiparp ARTD14 AW558171 PA       | 2.50251756 | 2.123312818793e-315 |
| NM_013633     | Pou5f1 NF-A3 Oct-3 Oct-3/4 C    | 2.44648592 | 5.94E-05            |
| NM_139303     | Kif18a AU024633 B130001M1       | 2.44167858 | 1.27E-150           |
| NM_008416     | Junb - - 8 C2-D1 8 41.41 cM f   | 2.43737101 | 2.53E-102           |
| NM_010118     | Egr2 Egr-2 Krox-20 Krox20 NC    | 2.39985151 | 3.25E-49            |
| NM_153287     | Csrnp1 4931429D10Rik Axud1      | 2.38447324 | 2.01E-78            |
| NM_001139     | Nr4a2 HZF-3 NOT Nurr1 RNR-      | 2.37369897 | 1.25E-241           |
| NR_049184     | Mir3544 mmu-mir-3544 - 12       | 2.36960456 | 2.77E-05            |
| NM_010276     | Gem AV020497 RP23-54P14.1       | 2.34765136 | 1.68E-20            |
| NM_019518     | Grasp tamalin MNCb-4428 15      | 2.32608047 | 3.63E-66            |
| NM_018820     | Sertad1 1110032C13Rik AV00C     | 2.29167851 | 2.91E-24            |
| NM_013642     | Dusp1 3CH134 MKP1 Ptpn16        | 2.28939296 | 2.25E-93            |
| NM_008082     | Galr1 Galnr1 - 18 E3-E4 18 55   | 2.25644338 | 4.76E-22            |
| NM_027127     | Gpx8 2310016C16Rik AU0170C      | 2.2458345  | 8.16E-09            |
| NM_001163     | Tchh AHF AI597080 Thh - 3 F     | 2.24048943 | 1.35E-52            |
| NM_007540     | Bdnf - - RP23-393E8.1 2 E3 2 5C | 2.24002801 | 0                   |
| NM_018826     | Irx5 - - 8 C5 8 44.93 cM prote  | 2.21989409 | 7.41E-05            |
| NM_011562     | TdGF1 CR1 cripto - 9 F3 9 60.7  | 2.21711673 | 1.92E-06            |
| NR_029752     | Mir129-2 Mirn129-2 - 2 2 ncf    | 2.174405   | 3.35E-08            |

|           |                                |            |            |
|-----------|--------------------------------|------------|------------|
| NM_010499 | Ier2 AI317238 Ch1 Pip92 - 8    | 2.13355409 | 1.25E-30   |
| NR_106139 | Mir129b mmu-mir-129b - nc      | 2.13307097 | 3.21E-07   |
| NR_033307 | 4930592I03Rik - 18 18 ncRN     | 2.10006713 | 1.62E-15   |
| NM_008842 | Pim1 Pim-1 - 17 A3.3 17 15.3   | 2.08972335 | 9.37E-30   |
| NM_001277 | Fgf5 Fgf-5 HBGF-5 angora go    | 2.08796748 | 5.49E-55   |
| NM_001081 | Ccno C86987 Ccnu E130318K1     | 2.08582085 | 1.81E-16   |
| NM_018781 | Egr3 Pilot - 14 D2 14 protein- | 2.02578485 | 1.38E-39   |
| NM_019636 | Tbc1d1 1110062G02Rik AI385     | 2.01008944 | 7.28E-256  |
| NM_027136 | Ovca2 9030414M07Rik RP23-1     | 1.99339445 | 2.46E-114  |
| NM_015743 | Nr4a3 AI573420 CHN CSMF M      | 1.98525075 | 0          |
| NM_001146 | Rnf217 AU016819 Ibrdc1 - 10    | 1.98323856 | 0          |
| NM_001172 | Arid5a D430024K22Rik Mrf1 -    | 1.98057607 | 1.07E-127  |
| NM_001164 | Ankrd33b 0610012A05Rik 302     | 1.96369306 | 9.35E-90   |
| NM_009754 | Bcl2l11 1500006F24Rik Bim B    | 1.96079533 | 6.23E-65   |
| NM_007878 | Drd4 AW125663 D4R Drd-4 -      | 1.96030546 | 0.0001167  |
| NM_144549 | Trib1 A530090O15Rik TRB-1 T    | 1.93183081 | 5.00E-60   |
| NM_199449 | Zhx2 Afr-1 Afr1 Raf mKIAA08    | 1.92513494 | 1.30E-217  |
| NM_009538 | Plagl1 Lot1 Zac1 AL713985.1    | 1.92234118 | 1.96E-152  |
| NM_148947 | Ly6g5c G5c NG33 - 17 B1 17     | 1.88784925 | 0.00017578 |
| NM_028894 | Lonrf3 4932412G04Rik 573043    | 1.87364807 | 2.78E-49   |
| NM_001081 | Phf21b A730032D07Rik - 15 E    | 1.85851396 | 2.09E-79   |
| NM_001284 | Homer1 PSD-Zip45 SYN47 Ves     | 1.85514166 | 4.23E-302  |
| NM_019657 | Hsd17b12 2610510O05Rik AI1     | 1.85027969 | 8.13E-279  |
| NM_007670 | Cdkn2b AV083695 INK4b MTS      | 1.84615573 | 0.00026815 |
| NM_172152 | Slc24a4 A930002M03Rik AW4      | 1.84177944 | 2.19E-264  |
| NM_029210 | Sv2c 4930527L09Rik AI841971    | 1.82556886 | 4.19E-208  |
| NM_009621 | Adamts1 ADAM-TS1 ADAMTS        | 1.82503811 | 1.10E-99   |
| NM_080555 | Ppap2b 1110003O22Rik 26100     | 1.8236164  | 5.24E-132  |
| NM_013562 | Ifrd1 Ifnl PC4 Tis7 - 12 B1 12 | 1.81699754 | 6.98E-201  |
| NM_010720 | Lipg 3110013K01Rik EL lipase   | 1.81554358 | 5.44E-107  |
| NM_009311 | Tac1 4930528L02Rik NK-1 NK     | 1.73615125 | 1.63E-09   |
| NM_053075 | Rheb - 5 A3 5 protein-codin    | 1.72196296 | 1.18E-211  |
| NM_011597 | Tjp2 ZO-2 - 19 C1 19 protein-  | 1.69884522 | 1.31E-128  |
| NM_001168 | Bcor 5830466J11Rik 8430401K    | 1.67983383 | 1.41E-182  |
| NR_040331 | E130215H24Rik - 2 2 ncRNA      | 1.6795124  | 2.27E-09   |
| NM_011401 | Slc2a3 AA408729 AL023014 A     | 1.67905844 | 9.35E-171  |
| NM_001008 | Mxi1 ENSMUSG00000067085        | 1.6696989  | 8.39E-169  |
| NM_010899 | Nfatc2 AI607462 NF-ATc2 NFA    | 1.66940925 | 4.41E-94   |
| NM_019819 | Dusp14 1110014C10Rik 23100     | 1.66875594 | 7.71E-70   |
| NM_176933 | Dusp4 2700078F24Rik AI84461    | 1.66402767 | 6.71E-89   |
| NM_001285 | Zdbf2 4930431J08Rik 9330107    | 1.66026662 | 1.75E-208  |
| NM_178197 | Hist1h2bh H2b-221 RP23-283N    | 1.65826155 | 1.96E-06   |

|           |                                |            |            |
|-----------|--------------------------------|------------|------------|
| NM_010155 | Erf - - 7 A3 7 13.73 cM protei | 1.65720542 | 4.93E-70   |
| NM_029466 | Arl5b 4930587A11Rik AW1464     | 1.65359247 | 5.17E-144  |
| NM_011448 | Sox9 2010306G03Rik AV22092     | 1.65197009 | 2.11E-41   |
| NM_008154 | Gpr3 Gpcr20 Gpcr21 Gpcr3 RI    | 1.63470816 | 1.05E-15   |
| NM_026268 | Dusp6 1300019I03Rik MKP-3 I    | 1.62789842 | 1.88E-77   |
| NM_011065 | Per1 Per m-rigui mPer1 RP23-   | 1.62721445 | 6.84E-98   |
| NM_026014 | Cdt1 2610318F11Rik AW54565     | 1.6270229  | 2.63E-07   |
| NM_183033 | Zfp516 C330029B10Rik D2300:    | 1.62315031 | 2.48E-143  |
| NM_001276 | Ism1 5430433G21Rik Ism RP2:    | 1.61865954 | 1.21E-54   |
| NM_025499 | Eid3 1700027M21Rik NS4EB -     | 1.61490447 | 0.0002986  |
| NM_008690 | Nfkbie IKBE - 17 17 C protein  | 1.61074452 | 9.56E-10   |
| NM_001114 | Fam189a2 AI414343 AI666772     | 1.59466535 | 3.74E-135  |
| NM_001177 | Ak4 AK 4 Ak-3 Ak-4 Ak3 Ak3I:   | 1.58486663 | 6.46E-80   |
| NM_001085 | Dusp5 Gm337 - 19 D2 19 pro     | 1.57743407 | 1.53E-30   |
| NM_201601 | Fgfr2 AU043015 AW556123 B:     | 1.56740618 | 3.06E-131  |
| NM_009061 | Rgs2 GOS8 AL592303.1 1 F 1     | 1.56719128 | 2.78E-128  |
| NM_010831 | Sik1 Msk Sik Snf1lk - 17 B1 1  | 1.56473338 | 2.24E-92   |
| NM_001042 | Smad7 Madh7 - 18 E2 18 pro     | 1.56348135 | 7.96E-92   |
| NM_009217 | Sstr2 SSTR-2 Smstr-2 Smstr2 s  | 1.56131901 | 3.20E-32   |
| NM_009196 | Slc16a1 AL022710 Mct1 - 3 F:   | 1.56033533 | 2.69E-92   |
| NM_175318 | Spty2d1 5830435K17Rik AI852    | 1.54607255 | 9.01E-67   |
| NM_144797 | Metrn1 9430048M07Rik BC019     | 1.53994449 | 1.35E-10   |
| NM_011491 | Stc2 AW125853 Stc2 mustc2      | 1.53709285 | 1.06E-40   |
| NM_010279 | Gfra1 AU042498 - 19 D2-D3 1    | 1.53638914 | 1.38E-130  |
| NM_008872 | Plat AU020998 AW212668 D8      | 1.53507351 | 6.35E-88   |
| NM_008871 | Serpine1 PAI-1 PAI1 Planh1 -   | 1.53132317 | 0.00045655 |
| NM_001252 | Mest AA408879 AI256745 Peg     | 1.53060293 | 2.67E-152  |
| NR_029765 | Mir337 Mirn337 mmu-mir-337     | 1.5286407  | 0.00040618 |
| NM_013815 | Baz1a Acf1 B930060C03 BC06     | 1.51420652 | 8.11E-66   |
| NM_008013 | Fgl2 AI385601 musfiblp - 5 A:  | 1.51086987 | 1.27E-05   |
| NM_017373 | Nfil3 AV225605 E4BP4 - 13 B:   | 1.50999969 | 1.60E-137  |
| NM_008037 | Fosl2 Fra-2 - 5 B1 5 17.33 cM  | 1.499449   | 3.24E-161  |
| NM_001081 | Cartpt Cart - 13 13 D1 protei  | 1.49007551 | 2.29E-05   |
| NM_178710 | Sik2 G630080D20Rik Snf1lk2 -   | 1.48744234 | 7.29E-189  |
| NM_008970 | Pthlh PTH-like Pthrp RP24-249  | 1.47970833 | 1.69E-10   |
| NM_023794 | Etv5 1110005E01Rik 8430401F    | 1.47440659 | 8.50E-143  |
| NM_001145 | Ube2q1 3110006E14Rik - 13 (    | 1.47335836 | 1.69E-164  |
| NM_001160 | Fam46a D930050G01Rik - 9 E:    | 1.46916373 | 2.90E-13   |
| NM_011066 | Per2 mKIAA0347 mPer2 - 1 1     | 1.465553   | 1.62E-91   |
| NM_026424 | Coq10b 1500041J02Rik 17000:    | 1.46503595 | 1.55E-49   |
| NM_203491 | Chrm2 AChR-M2 Chrm-2 M2        | 1.45549701 | 1.59E-139  |
| NR_045328 | A330009N23Rik - - 15 F2 15 r   | 1.45321056 | 7.60E-08   |

|           |                                 |            |           |
|-----------|---------------------------------|------------|-----------|
| NM_010206 | Fgfr1 AW208770 Eask FLG Fgl     | 1.44920195 | 1.23E-116 |
| NM_001081 | Irs2 Irs-2 - 8 A1.1 8 5.35 cM p | 1.44892199 | 3.83E-82  |
| NM_007424 | Acan Agc Agc1 Cspg1 b2b183      | 1.4409344  | 2.10E-99  |
| NM_207515 | Mbnl2 1110002M11Rik AI0478      | 1.43907323 | 1.23E-176 |
| NM_030244 | Ier5l 2610524G09Rik RP23-399    | 1.4385104  | 1.25E-10  |
| NM_010591 | Jun AP-1 Junc c-jun RP23-135    | 1.43628653 | 1.23E-41  |
| NM_025626 | Fam107b 3110001A13Rik AA5i      | 1.42603841 | 8.41E-125 |
| NM_027715 | Otud1 4933428L19Rik RP23-52     | 1.4110962  | 2.30E-18  |
| NM_008077 | Gad1 EP10 GAD25 GAD44 GA        | 1.40222007 | 9.60E-152 |
| NM_198300 | Cpeb3 4831444O18Rik mKIAA       | 1.39650446 | 8.47E-175 |
| NM_008427 | Kcnj4 IRK3 Kcnf2 MB-IRK3 - 1    | 1.39643993 | 6.94E-68  |
| NM_013559 | Hsph1 105kDa AI790491 Hsp1      | 1.39153224 | 1.97E-91  |
| NM_027926 | Cpa4 1110019K20Rik AV00955      | 1.39044489 | 6.64E-08  |
| NM_030055 | Tmem210 4930571C24Rik RP2       | 1.38374727 | 1.64E-13  |
| NM_007791 | Csrp1 AA408841 AA959891 A       | 1.37802146 | 5.75E-19  |
| NM_001002 | Penk AI326464 ENK PPA Penk      | 1.37583853 | 5.47E-16  |
| NM_028127 | Frmd6 2610019M19Rik 49304i      | 1.36728532 | 4.50E-103 |
| NM_030880 | Pacsin3 4921507A02Rik 63304     | 1.35040617 | 2.07E-12  |
| NM_001001 | Zfp36l2 Brf2 ERF2 Tis11d - 17   | 1.34940122 | 3.54E-08  |
| NM_001284 | Hdac5 AI426555 Hdac4 mHDA       | 1.34905213 | 1.57E-127 |
| NM_007927 | Emd AW550900 Sta RP23-436       | 1.3476842  | 9.76E-29  |
| NM_010121 | Eif2ak3 AI427929 Pek Perk - i   | 1.34017347 | 5.09E-95  |
| NM_009185 | Stil Sil RP23-295C20.5 4 D1 4   | 1.33554508 | 5.17E-30  |
| NM_181444 | Gprc5a Rai3 Rai1 - 6 G1 6 p     | 1.33545694 | 1.70E-05  |
| NM_026418 | Rgs10 2310010N19Rik - 7 F3 :    | 1.33052464 | 2.08E-46  |
| NM_009875 | Cdkn1b AA408329 AI843786 k      | 1.32775149 | 8.26E-53  |
| NM_172705 | Phf13 BC029632 Phf5 SPOC1       | 1.32696892 | 6.53E-18  |
| NM_001033 | Layn E030012M19Rik Gm511        | 1.32565432 | 5.81E-09  |
| NM_138953 | Ell2 - - 13 C1 13 protein-codir | 1.32420737 | 1.72E-86  |
| NM_008985 | Ptprn IA-2 mIA-A mKIAA4064      | 1.32416413 | 3.30E-119 |
| NM_177839 | Tnn Tnw tenascin-W - 1 H2.1     | 1.32210949 | 5.45E-26  |
| NM_001033 | Fbxo33 5730501N20Rik AI642:     | 1.31221149 | 4.85E-79  |
| NM_026993 | Ddah1 2410006N07Rik 251001      | 1.30768963 | 5.16E-128 |
| NM_175141 | 1810030O07Rik - RP24-392J24     | 1.30673708 | 3.08E-58  |
| NM_021451 | Pmaip1 Noxa - 18 E1 18 proti    | 1.30579566 | 7.65E-06  |
| NR_027955 | 4931440P22Rik - - 3 E1 3 ncR    | 1.30525916 | 8.92E-11  |
| NM_026886 | Srrm4 1500001A10Rik B23020      | 1.30461372 | 4.81E-154 |
| NM_172574 | Pqlc3 C78076 E030024M05Rik      | 1.30273766 | 3.23E-57  |
| NM_001205 | Jarid2 Jmj jumonji - 13 A5 13   | 1.29847942 | 6.47E-152 |
| NM_172271 | Slc6a17 AW490886 D130012J1      | 1.29615925 | 2.65E-145 |
| NM_011897 | Spry2 sprouty2 - 14 E2.3 14 5   | 1.28856421 | 8.87E-49  |
| NM_144923 | Blvrb - - 7 A3 7 protein-codin  | 1.28409937 | 1.28E-12  |

|                  |                                       |            |                 |
|------------------|---------------------------------------|------------|-----------------|
| NR_040660        | A730063M14Rik - - 10 D3 10            | 1.28101646 | 1.23E-10        |
| NM_008580        | Map3k5 7420452D20Rik ASK              | 1.27585664 | 2.48E-109       |
| NM_011580        | Thbs1 TSP-1 TSP1 Thbs-1 tbsp          | 1.27378559 | 1.50E-17        |
| NM_028083        | Chaf1b 2600017H24Rik C7614            | 1.27353588 | 1.88E-12        |
| NM_001037        | Baiap2 IRSp53 R75030 RP23-3           | 1.27321875 | 2.81E-108       |
| NM_011400        | Slc2a1 Glut-1 Glut1 RP23-344          | 1.27313431 | 2.61E-19        |
| NM_025404        | Arl4d 1110036H21Rik ARL6 A            | 1.27184649 | 2.19E-09        |
| NM_010910        | Nefl A1847934 CMT2E NF-L N            | 1.26500372 | 3.60E-37        |
| NR_027825        | 4930470P17Rik - RP23-43J11.2          | 1.26223363 | 1.21E-06        |
| NM_009769        | Klf5 4930520J07Rik Bteb2 CKL          | 1.26195845 | 5.38E-52        |
| NM_001163        | Rhpn1 BB023497 Grbp Rhop              | 1.25968817 | 4.88E-07        |
| NR_015500        | A530013C23Rik - - 2 H3 2 ncf          | 1.25650673 | 6.31E-08        |
| NM_013692        | Klf10 A1115143 EGR[a] Egral C         | 1.25369054 | 3.55E-19        |
| NM_027498        | Sik3 5730525O22Rik 9030204            | 1.25329294 | 1.23E-141       |
| NM_013863        | Bag3 AA407278 Bis mg638 M             | 1.24659614 | 1.57E-07        |
| NM_145450        | BC022687 AW050009 C13000              | 1.24634781 | 2.39E-12        |
| NM_001040        | Peg10 AA407948 Edr HB-1 M             | 1.24459306 | 1.32E-47        |
| NM_001081        | Sipa12 BC058408 mKIAA1389             | 1.24300037 | 1.83E-90        |
| <b>NM_001111</b> | <b>Igf1 C730016P09Rik Igf-1 Igf-I</b> | 1.24127972 | <b>2.05E-48</b> |
| NM_001033        | Lsmem1 Gm889 - 12 B1 12 p             | 1.24028951 | 1.23E-32        |
| NM_001081        | Dmxl1 C630007L23Rik D03003            | 1.23992279 | 6.49E-138       |
| NM_198408        | Crhbp CRH-BP - 13 D1 13 49.5          | 1.23727537 | 8.79E-13        |
| NM_177290        | Itgb8 4832412O06Rik - 12 F2           | 1.2371848  | 2.76E-100       |
| NM_009072        | Rock2 B230113H15Rik ROKalp            | 1.23649246 | 3.79E-132       |
| NM_013904        | Hey2 CHF1 Herp1 Hrt2 bHLHt            | 1.23529218 | 0.00030083      |
| NM_001278        | Rgag4 6430402L03Rik Mar5 M            | 1.23286531 | 2.62E-19        |
| NM_011701        | Vim - RP23-185P20.1 2 A2 2 1          | 1.22823428 | 8.83E-23        |
| NM_205769        | Crh CRF Gm1347 - 3 A2 3 5.7           | 1.22663789 | 0.0002242       |
| NM_011898        | Spry4 A030006O18Rik sprouty           | 1.22555753 | 3.06E-23        |
| NM_013626        | Pam PHM - 1 D 1 47.76 cM p            | 1.22051284 | 7.27E-142       |
| NM_001048        | Med14 9930001L01Rik AU041             | 1.21830728 | 2.40E-108       |
| NM_011246        | Rasgrp1 Rasgrp RP23-73I19.3           | 1.21821158 | 4.85E-63        |
| NM_001002        | Lmna Dhe - 3 F1 3 38.84 cM            | 1.21683882 | 9.79E-50        |
| NM_010295        | Gclc D9Wsu168e GLCL-H Ggcs            | 1.21438034 | 8.60E-59        |
| NM_181318        | Rasgef1b 4732452O09Rik GPIg           | 1.21350184 | 2.16E-66        |
| NR_045475        | 1700001D01Rik - - 8 8 ncRNA           | 1.21348487 | 4.52E-16        |
| NM_008654        | Ppp1r15a 9630030H21 Gadd3             | 1.21081706 | 1.97E-13        |
| NM_139227        | Atxn7 A430107N12Rik A16270            | 1.21079272 | 1.62E-97        |
| NM_027514        | Pvr 3830421F03Rik CD155 D7            | 1.20957971 | 3.71E-47        |
| NR_102305        | D830026I12Rik - - 6 6 ncRNA           | 1.20505088 | 0.00010847      |
| NM_021432        | Nap1l5 1110020M21Rik MNct             | 1.20466606 | 2.11E-32        |
| NM_001080        | Btaf1 A1414500 A1447930 E43           | 1.20445337 | 1.53E-116       |

|           |                                 |            |            |
|-----------|---------------------------------|------------|------------|
| NM_029688 | Srxn1 1700127B04Rik AI85406     | 1.19369321 | 2.50E-10   |
| NM_011141 | Pou3f1 Oct-6 Oct6 Otf-6 Otf6    | 1.1918119  | 2.06E-20   |
| NM_028016 | Nanog 2410002E02Rik ENK ec      | 1.18830774 | 5.22E-05   |
| NM_175460 | Nmnat2 AI843915 D030041109      | 1.18427321 | 2.30E-124  |
| NM_010128 | Emp1 I-8-09 TMP - 6 G1 6 66     | 1.18231523 | 0.00055683 |
| NM_020265 | Dkk2 - - 3 3 H2 protein-codin   | 1.18099954 | 1.05E-37   |
| NM_145478 | Pim3 BC026639 Kid1 - 15 E3      | 1.17951799 | 2.17E-17   |
| NR_040450 | Gm20356 - - 3 3 33.61 cM nc     | 1.17908714 | 2.52E-05   |
| NM_027711 | Iqgap2 4933417J23Rik A63005     | 1.17821281 | 1.10E-86   |
| NM_010430 | Hic1 AA408311 HIC-1 RP23-14     | 1.1759558  | 1.79E-06   |
| NM_027113 | Wdr5b 2310009C03Rik AI6069      | 1.17338528 | 1.02E-08   |
| NM_029735 | Eprs 2410081F06Rik 3010002K     | 1.1715014  | 3.49E-104  |
| NM_020507 | Tob2 2900090N22Rik 4930545      | 1.16782892 | 2.27E-34   |
| NM_153508 | Clstn3 CSTN3 Cs3 Cst-3 mKIA/    | 1.16024759 | 1.65E-95   |
| NM_012008 | Ddx3y 8030469F12Rik D1Pas1-     | 1.15937503 | 1.20E-43   |
| NM_011612 | Tnfrsf9 4-1BB A930040I11Rik ,   | 1.1591355  | 3.75E-08   |
| NM_010127 | Pou6f1 2310038G18Rik Brn5.0     | 1.15710378 | 6.63E-40   |
| NM_028057 | Cyb5r1 1500005G05Rik B5R.1      | 1.15332068 | 1.02E-16   |
| NM_001081 | Mpp7 1110068J02Rik 2810038      | 1.15044867 | 5.43E-80   |
| NM_013550 | Hist1h3a - - 13 13 A2-A3 prot   | 1.14649551 | 0.00010928 |
| NM_010437 | Hivep2 MIBP1 Schnurri-2 Shn-    | 1.14479258 | 1.75E-123  |
| NM_011498 | Bhlhe40 Bhlhb2 C130042M06F      | 1.14331936 | 2.89E-12   |
| NR_046047 | Gm11186 OTTMUSG0000000000       | 1.1431158  | 7.05E-05   |
| NM_001163 | Elmsan1 9430029N19Rik C130      | 1.13678841 | 2.52E-62   |
| NM_015771 | Lats2 4932411G09Rik AV2772f     | 1.13319604 | 1.14E-46   |
| NM_013548 | Hist1h3f H3.2-221 Hist1 - 13 /  | 1.13023539 | 6.05E-05   |
| NM_008465 | Kpna1 AW494490 IPOA5 NPI1       | 1.13022524 | 2.70E-88   |
| NM_153529 | Nrn1 0710008J23Rik Cpg15 Ni     | 1.12938192 | 1.12E-33   |
| NM_001103 | Tulp4 1110057P05Rik 221003f     | 1.12631153 | 1.48E-113  |
| NM_199223 | Rtn4rl2 Ngr2 Ngrh1 Ngrl3 - 2    | 1.12457158 | 6.32E-42   |
| NM_144491 | Dph1 2310011M22Rik 493048:      | 1.12399357 | 3.50E-34   |
| NM_009044 | Rel c-Rel - 11 A3.2 11 14.36 cl | 1.12143985 | 1.27E-19   |
| NM_198092 | Usp2 B930035K21Rik Ubp41 N      | 1.12040266 | 6.76E-46   |
| NM_029879 | Rgs7bp A930030I01Rik AI8422     | 1.11811416 | 3.39E-105  |
| NM_001111 | Cdkn1a CAP20 CDKI CIP1 Cdkl     | 1.11762493 | 2.35E-32   |
| NM_022019 | Dusp10 2610306G15Rik AI158:     | 1.11667314 | 3.57E-19   |
| NM_178192 | Hist1h4a - mCG_17007 13 A2-     | 1.11357683 | 8.09E-05   |
| NM_010500 | Ier5 - - 1 G3 1 66.45 cM prote  | 1.11080437 | 2.81E-16   |
| NM_001039 | Vgf Gm1052 - 5 G2 5 76.13 cM    | 1.10928057 | 7.92E-49   |
| NM_001081 | Mn1 AA003644 AA009236 - 5       | 1.10818341 | 2.64E-81   |
| NM_001033 | Heca Gm869 HDC HDCL - 10.       | 1.10732379 | 9.10E-66   |
| NM_010143 | Ephb3 AW456895 Cek10 Etk2       | 1.10718989 | 5.44E-09   |

|                                         |            |            |
|-----------------------------------------|------------|------------|
| NM_001042: Pcdh8 1700080P15Rik Papc -   | 1.10633737 | 4.18E-38   |
| NM_177632 Fam43a Tuf1 - 16 B2 16 prot   | 1.10607316 | 0.00012467 |
| NM_021565 Midn 3000003C15Rik - 10 C1    | 1.10590898 | 9.54E-55   |
| NM_177222 Casc1 A230084G12Rik Las1 RF   | 1.10588303 | 2.35E-13   |
| NM_010478 Hspa1b Hsp70 Hsp70-1 Hsp70    | 1.10524142 | 5.79E-06   |
| NM_013610 Ninj1 AU024536 - 13 A5 13 p   | 1.10274553 | 2.79E-06   |
| NM_021301 Slc15a2 8430408C16Rik C7886   | 1.10270171 | 4.78E-16   |
| NM_010638 Klf9 2310051E17Rik AA589643   | 1.09642069 | 1.13E-40   |
| NM_175314 Adamts9 1810011L16Rik 8430.   | 1.09586944 | 5.45E-26   |
| NM_009142 Cx3cl1 AB030188 ABCD-3 AI84   | 1.09578588 | 8.95E-40   |
| NM_199299 Jade2 1200017K05Rik AI48068   | 1.0925927  | 1.12E-27   |
| NM_001145: Stk40 2310004N11Rik AI42879  | 1.08936464 | 4.53E-62   |
| NM_144802 HnrnpII 2510028H02Rik 28100   | 1.08644261 | 2.35E-78   |
| NM_001145: Gm13889 Ag2 OTTMUSG0000      | 1.08550485 | 4.32E-07   |
| NM_183408 Pde4a D9Ertd60e Dpde2 - 9 A   | 1.08134223 | 1.87E-69   |
| NM_145456 Zswim6 2900036G02Rik mKIA/    | 1.08126144 | 2.06E-110  |
| NM_013598 Kitl Clo Con Gb Kitlg Mgf SCF | 1.08097176 | 1.66E-90   |
| NM_019967 Brinp1 BRINP Dbc1 Dbccr1 Fa   | 1.08019757 | 2.71E-110  |
| NM_133919 Aff1 9630032B01Rik AW31919    | 1.07842153 | 3.69E-54   |
| NM_177469 Gpr123 2900059M17Rik D7Ert    | 1.07821804 | 4.66E-61   |
| NM_025696 Sorcs3 6330404A12Rik AW045    | 1.07666752 | 4.14E-103  |
| NM_201531 Kcnf1 Gm1182 Kv5.1 - 12 A1.   | 1.07612092 | 2.77E-21   |
| NM_009024 Rara Nr1b1 RAR RARalpha1 R    | 1.07551591 | 2.32E-27   |
| NM_015806 Mapk6 2610021I23Rik D13005    | 1.07547511 | 3.88E-53   |
| NM_173867 Rcc2 2610510H01Rik 2610529    | 1.07279762 | 1.39E-32   |
| NM_013807 Plk3 Cnk Fnk PRK RP23-59L24   | 1.07190938 | 1.37E-11   |
| NM_001111: Nedd9 Cas-L CasL HEF1 MEF1   | 1.07129864 | 1.61E-52   |
| NR_029460 6530402F18Rik mKIAA1857 mi    | 1.07036988 | 1.82E-49   |
| NM_009556 Zfp42 Rex-1 Rex1 Zfp-42 - 8 / | 1.06891985 | 5.02E-05   |
| NM_009546 Trim25 AA960166 AL022677 E    | 1.06852135 | 3.74E-05   |
| NM_001243: Rassf1 123F2 AA536941 AU04   | 1.06678135 | 2.57E-28   |
| NM_001285: Gls2 A330074B06Rik AI195532  | 1.06675146 | 2.41E-18   |
| NM_007419 Adrb1 Adrb-1 beta-AR - 19 D2  | 1.06621554 | 2.85E-14   |
| NR_003513 Neat1 2310043N10Rik VINC -    | 1.06510185 | 1.01E-09   |
| NM_019430 Cacng3 - - 7 F3 7 protein-cod | 1.06383677 | 2.01E-54   |
| NM_001004: Maml3 AV234550 BC049812 P    | 1.06171741 | 1.17E-102  |
| NR_045434 2900008C10Rik - - X A1.1 X n  | 1.05898243 | 3.40E-16   |
| NM_001081: Cystm1 0610010O12Rik - 18 :  | 1.05152261 | 1.45E-49   |
| NM_027977 Apmap 2310001A20Rik AI3148    | 1.05118908 | 3.01E-43   |
| NM_001163: Ccdc147 Gm969 - 19 D1 19 p   | 1.05062658 | 1.70E-13   |
| NM_177140 Tmem251 D230037D09Rik - 1     | 1.05036688 | 9.88E-08   |
| NM_199322 Dot1l A630076O07 AW907654     | 1.04942469 | 2.47E-66   |

|           |                                |            |            |
|-----------|--------------------------------|------------|------------|
| NM_011527 | Tal1 SCL/tal-1 ScI bHLHa17 ta  | 1.04600634 | 0.00011731 |
| NM_001282 | Ntrk2 GP145-TrkB/GP95-TrkB     | 1.04595231 | 5.58E-108  |
| NR_045283 | Gm15941 OTTMUSG00000028        | 1.04475178 | 1.08E-18   |
| NM_001165 | Ctage5 D12Bwg0579e Mea6 N      | 1.04430778 | 1.35E-68   |
| NR_028264 | Dleu2 1810047A16Rik 493241     | 1.04414511 | 1.71E-79   |
| NM_001033 | Usp36 2700002L06Rik mKIAA1     | 1.0427453  | 4.11E-59   |
| NM_001039 | Mlf1 HLS7 - 3 E1 3 30.91 cM    | 1.04226218 | 1.10E-05   |
| NM_001167 | Gpr19 - - 6 G1 6 protein-codi  | 1.03815319 | 2.19E-48   |
| NM_145630 | Pdk3 2610001M10Rik AI03563     | 1.03766548 | 2.28E-35   |
| NM_016803 | Chst3 C6ST C6ST-1 GST-0 - 1C   | 1.03709678 | 2.18E-10   |
| NM_008990 | Pvr12 AI325026 AI987993 Cd1    | 1.03665053 | 6.83E-38   |
| NM_178185 | Hist1h2ap ENSMUSG00000060      | 1.03475912 | 2.22E-09   |
| NM_177606 | Plekhh2 AI256725 E030001K0     | 1.03037773 | 2.43E-45   |
| NM_008926 | Prkg2 AW212535 CGKII Prkgr2    | 1.03008037 | 3.13E-37   |
| NM_010755 | Maff - - 15 E1 15 37.7 cM prc  | 1.02347197 | 1.64E-22   |
| NM_001081 | Tbc1d8b 4921505D17Rik 9030     | 1.02222907 | 1.08E-16   |
| NM_001177 | Hist1h2ao Rp23-480b19.10 RP    | 1.0222054  | 4.15E-10   |
| NR_038006 | 9630028B13Rik - - 1 H5 1 ncF   | 1.02161013 | 5.30E-17   |
| NM_212457 | Bex4 - RP23-1A3.7 XE3 X prol   | 1.01788332 | 3.28E-06   |
| NM_012051 | Etv3 AI414410 METS Pe1 - 3     | 1.0171615  | 4.22E-29   |
| NM_009174 | Siah2 AA415433 Sinh2 - 3 D     | 1.01398808 | 1.38E-32   |
| NM_029332 | Akap13 1700026G02Rik 57305     | 1.01048376 | 1.64E-64   |
| NM_001033 | Gfod1 9630032O13 AI850995      | 1.01028368 | 1.08E-75   |
| NM_144813 | Slc24a1 - - 9 C 9 protein-codi | 1.0086835  | 2.63E-24   |
| NM_134255 | Elov5 1110059L23Rik AI74731    | 1.00849884 | 5.68E-62   |
| NM_001042 | Trim71 2610206G21Rik AL022     | 1.0070872  | 8.03E-23   |
| NM_001205 | LOC100504608 - - protein-cr    | 1.00640476 | 3.55E-09   |
| NM_009129 | Scg2 Chgc SgII - 1 C4 1 40.89  | 1.00572193 | 5.66E-47   |
| NM_010757 | Mafk AW061068 NF-E2 Nfe2u      | 1.00375917 | 3.23E-08   |
| NM_008974 | Ptp4a2 Prl-2 RP23-114O4.2 4    | 1.00262177 | 5.68E-60   |
| NR_027893 | BB123696 - - ncRNA             | 0.99929621 | 0.00064927 |
| NM_145359 | Ubald1 1500031H01Rik BC013     | 0.99753644 | 4.00E-22   |
| NM_011023 | Otx1 A730044F23Rik jv RP23-    | 0.99699147 | 3.77E-05   |
| NM_001033 | Gm1604b ENSMUSG00000073        | 0.99615985 | 8.91E-48   |
| NM_016709 | Auh C77140 W91705 - 13 B1      | 0.99599459 | 5.23E-67   |
| NM_011915 | Wif1 AW107799 WIF-1 - 10 D     | 0.99504034 | 2.61E-18   |
| NM_133753 | Errfi1 1300002F13Rik AI78875   | 0.99324298 | 1.27E-26   |
| NM_133501 | Ntng2 2610016D08Rik Lmnt2      | 0.99311681 | 5.89E-78   |
| NM_029999 | Lbh 1810009F10Rik 6720416L1    | 0.9926527  | 5.08E-48   |
| NM_026921 | Isca1 1810010A06Rik Hbld2 -    | 0.99204218 | 2.53E-20   |
| NM_153155 | C1ql3 1110065A22Rik AI66162    | 0.99189196 | 1.99E-22   |
| NM_001081 | Lmtk2 2900041G10Rik A33010     | 0.99129343 | 9.49E-81   |



|           |                                |            |            |
|-----------|--------------------------------|------------|------------|
| NR_040759 | Kcnd3os 1700095B22Rik - 3 Fz   | 0.99121012 | 3.71E-10   |
| NM_172632 | Mapk4 A330097D03Rik Erk3 P     | 0.99109326 | 3.47E-79   |
| NM_013926 | Cbx8 Pc3 RP23-458A23.1 11 1    | 0.99042066 | 9.36E-06   |
| NM_001168 | Tsku 9530051K01Rik E2ig4 Lrr   | 0.99033354 | 3.88E-14   |
| NR_045390 | D730045A05Rik - - 18 18 ncR    | 0.98778333 | 8.52E-05   |
| NM_054045 | Hist2h3c2 H3-614 H3.2-614 Hi   | 0.9859902  | 0.00077268 |
| NR_037993 | B230216N24Rik - - 1 1 ncRN     | 0.98374375 | 1.37E-53   |
| NM_031396 | Cnm1 A1846314 Acdp1 CLP-1      | 0.98321138 | 9.08E-64   |
| NM_011777 | Zyx 9530098H06Rik R75157 -     | 0.98224331 | 6.97E-10   |
| NM_013779 | Magel2 Mage-l2 NDNL1 nM15      | 0.98192064 | 4.69E-11   |
| NM_026186 | Cwc25 1300013D05Rik AA473      | 0.97979791 | 1.54E-32   |
| NM_023790 | Wdr54 1700030E05Rik - 6 6 C    | 0.97306373 | 9.77E-07   |
| NM_001159 | Fam150b 6230419C23Rik - 12     | 0.97275153 | 4.41E-19   |
| NM_172142 | Nfkbid IkappaBNS - 7 B1 7 pr   | 0.97199734 | 3.38E-05   |
| NM_001136 | EdnrB ET-B ET-BR ETR-b ETb     | 0.96907941 | 4.85E-12   |
| NM_175140 | Chst8 1500011J21Rik AI42600    | 0.96848777 | 8.05E-66   |
| NR_002849 | 8430431K14Rik - - 19 C1 19 r   | 0.96841196 | 1.56E-05   |
| NM_172506 | Boc 4732455C11 mFLJ00376 -     | 0.96809341 | 2.15E-43   |
| NM_001205 | Pnoc N/OFQ N23K Npnc1 OFQ      | 0.96776067 | 4.90E-22   |
| NR_030711 | Mir22hg 2210403K04Rik - 11     | 0.96736111 | 8.45E-24   |
| NM_001113 | Tec - - 5 C3.2 5 38.44 cM pro  | 0.96304509 | 8.07E-21   |
| NM_178744 | Zbtb1 9430077A12 AI256369      | 0.96119111 | 6.04E-15   |
| NM_001109 | Apold1 Gm1075 - 6 G1 6 pro     | 0.96078801 | 1.74E-06   |
| NM_009294 | Stx4a Stx4 Syn-4 Syn4 - 7 7 F  | 0.95931092 | 9.96E-12   |
| NM_001164 | Mum1 1 9430086K21Rik - X F     | 0.95898958 | 3.31E-06   |
| NR_104381 | Plekhg5 BC023181 Syx RP23-2    | 0.95836413 | 3.01E-25   |
| NM_009510 | Ezr AW146364 R75297 Vil2 p     | 0.95824385 | 1.86E-12   |
| NM_172911 | D8Ertd82e 9830148H23 Sgk22     | 0.95781275 | 8.12E-31   |
| NM_016972 | Slc7a8 AA408822 LAT2 - 14 C    | 0.95736363 | 1.56E-63   |
| NM_198668 | 4930590J08Rik Gm1071 - 6 D     | 0.9563851  | 1.16E-19   |
| NM_011486 | Stat3 1110034C02Rik AW1099     | 0.95590329 | 1.15E-41   |
| NM_172781 | Klhl4 B130014A11 C130018J01    | 0.95548385 | 7.38E-30   |
| NM_001277 | Pex5 AW212715 ESTM1 PTS1f      | 0.95546347 | 3.29E-43   |
| NM_001271 | Skil Skir SnoN sno - 3 A3 3 1  | 0.95537304 | 5.52E-45   |
| NM_008439 | Khk - - 5 B1 5 16.9 cM proteir | 0.95446527 | 1.33E-09   |
| NM_008667 | Nab1 - - 1 C1.1 1 26.99 cM pr  | 0.95443126 | 1.44E-54   |
| NM_009447 | Tuba4a M[a]4 Tuba4 - 1 1 C3    | 0.95276424 | 8.68E-16   |
| NM_177854 | Sertm1 6030405A18Rik - 3 C     | 0.948367   | 2.42E-19   |
| NM_134080 | Flnb AL024016 - 14 A1 14 prc   | 0.94700472 | 4.20E-70   |
| NM_001199 | Cacng5 - RP23-145G23.1 11 E    | 0.94531003 | 7.04E-17   |
| NR_045384 | 5830416I19Rik - - 5 C3 5 ncR   | 0.94479765 | 1.07E-05   |
| NM_130447 | Dusp16 3830417M17Rik AW5       | 0.9443297  | 2.05E-26   |

|           |                               |            |            |
|-----------|-------------------------------|------------|------------|
| NM_178726 | Ppm1 3222401G13 5930404J2     | 0.94412413 | 3.27E-80   |
| NM_001142 | Plod2 D530025C14Rik LH2 Plo   | 0.94321116 | 1.51E-29   |
| NM_010218 | Fjx1 - RP23-224E21.3 2 E2 2 f | 0.94294345 | 7.04E-19   |
| NM_001166 | Tead1 2610024B07Rik B23011    | 0.94170935 | 6.38E-62   |
| NM_001111 | Tbc1d9 4933431N12Rik AI847    | 0.94058264 | 2.33E-71   |
| NM_024285 | Bves Pop1 Popdc1 mbVES - 1    | 0.93921361 | 1.26E-12   |
| NM_001282 | Vasp - - 7 A3 7 protein-codin | 0.93782174 | 1.39E-15   |
| NM_016695 | Mpp2 D11Bwg0652e Dlg2 Dlg     | 0.93757715 | 4.80E-30   |
| NM_023324 | Peli1 2810468L03Rik A930031   | 0.93739844 | 1.48E-73   |
| NM_007991 | Fbl AL022665 FIB FLRN RNU3    | 0.93506851 | 1.04E-16   |
| NR_027966 | 4930429B21Rik - - 3 A3 3 ncF  | 0.93427589 | 0.00040099 |
| NM_001162 | Dennd4a AI115600 AI851943     | 0.93372141 | 1.17E-70   |
| NR_045047 | 2810011L19Rik - - 12 E 12 nc  | 0.9332443  | 3.05E-27   |
| NM_207625 | Acsl4 9430020A05Rik ACS4 AL   | 0.9331154  | 6.27E-65   |
| NM_001162 | Zc3h12c A230108E06 C230027    | 0.93270075 | 1.56E-58   |
| NM_146030 | Plekh3 BC020025 RP23-281C     | 0.93195502 | 4.36E-05   |
| NM_001001 | H2-K1 H-2K H-2K(d) H2-K K-f   | 0.93182778 | 9.92E-09   |
| NM_175482 | Usp28 9830148O20Rik AU022     | 0.9312369  | 1.81E-44   |
| NM_009740 | Bcl10 AI132454 BCL-10 C8140   | 0.93115408 | 3.55E-08   |
| NM_080793 | Setd7 1600028F23Rik H3K4MT    | 0.92772087 | 9.55E-56   |
| NM_022995 | Pmepa1 2210418I02Rik AW45     | 0.92753402 | 3.06E-47   |
| NM_001177 | Grin1 GluN1 GluRdelta1 GluRz  | 0.923328   | 4.89E-63   |
| NM_027817 | Grap 8430435N19Rik BB23359    | 0.92271377 | 0.00011632 |
| NM_010595 | Kcna1 AI840627 Kca1-1 Kv1.1   | 0.92150831 | 2.14E-36   |
| NR_038004 | 4931429P17Rik - - 13 A5 13 r  | 0.92092263 | 5.09E-07   |
| NM_011404 | Slc7a5 4F2LC D0H16S474E LA7   | 0.91870393 | 3.48E-41   |
| NM_177059 | Fstl4 B230374F23Rik SPIG1 mi  | 0.91860029 | 1.75E-70   |
| NM_001164 | Irf2bp2 E130305N23Rik IRF-2B  | 0.91842049 | 1.25E-27   |
| NM_177914 | Dgkk Gm360 RP23-163A2.1 X     | 0.91742625 | 2.03E-20   |
| NM_144900 | Atp1a1 Atpa-1 BC010319 - 3 f  | 0.9171785  | 4.39E-49   |
| NM_001167 | Ankrd50 AI662170 E430012K2    | 0.91470576 | 2.10E-38   |
| NM_007978 | F8a AI852759 DXUcsf1 F8a1 F   | 0.91418698 | 3.76E-05   |
| NM_016798 | Pdim3 AI463105 ALP Actn2 p    | 0.9138226  | 1.07E-05   |
| NM_009167 | Shc3 N-Shc Rai ShcC - 13 A5   | 0.91196834 | 6.80E-71   |
| NM_133831 | Gltscr2 5330430H08Rik 94300   | 0.91183244 | 7.75E-16   |
| NM_011908 | Ubl3 AW108023 HCG - 5 5 G     | 0.91075348 | 4.93E-50   |
| NM_026784 | Pmvk 1110011E12Rik 2900002    | 0.91001462 | 3.91E-31   |
| NM_177192 | Dennd5b 9330160C06Rik AI85    | 0.90912634 | 4.39E-69   |
| NM_011843 | Esyt1 Fam62a Mbc2 vp115 -     | 0.90847081 | 6.09E-15   |
| NM_001037 | Adam15 MDC15 metargidin -     | 0.90411103 | 3.39E-23   |
| NM_015755 | Hunk Bstk1 Mak-v - 16 C3.3 j  | 0.90357858 | 2.03E-62   |
| NM_001163 | Wdr90 3230401M21Rik AI551     | 0.90165495 | 4.06E-22   |

|           |                                 |            |            |
|-----------|---------------------------------|------------|------------|
| NM_001033 | Kdm7a A630082K20Rik BB041       | 0.9014916  | 2.20E-37   |
| NM_019392 | Tyro3 AI323366 Br Dtk Etk-2     | 0.89815641 | 5.44E-28   |
| NM_197959 | Kif18b 3000004C01Rik RP23-4     | 0.89702577 | 0.00015328 |
| NM_144537 | Cpa5 4930430M09Rik - 6 A3.3     | 0.89702577 | 0.00015328 |
| NM_001254 | Rnf128 1300002C13Rik AI9878     | 0.89693666 | 1.23E-22   |
| NM_011896 | Spry1 sprouty1 - 3 B 3 proteii  | 0.89484435 | 2.09E-05   |
| NM_181585 | Pik3r3 AA414954 p55pik RP23     | 0.89423528 | 1.52E-54   |
| NM_008078 | Gad2 6330404F12Rik GAD(65)      | 0.89359797 | 3.42E-60   |
| NM_011392 | Slc34a1 NaPi-IIa Npt2 Npt2a S   | 0.89217994 | 4.82E-07   |
| NM_024171 | Sec61b 1190006C12Rik AI3261     | 0.89210943 | 1.86E-11   |
| NM_026770 | Cgref1 1110004G24Rik AW045      | 0.89130147 | 7.46E-17   |
| NM_031494 | Zfp275 5430431L06Rik AI5933     | 0.8907336  | 5.63E-24   |
| NR_045050 | 9130015A21Rik - - 12 A3 12 r    | 0.89055267 | 2.51E-06   |
| NR_040367 | Gm16796 - - 2 2 91.91 cM nc     | 0.88893491 | 0.00030103 |
| NM_023422 | Hist1h2bc 2610022J01Rik H2b     | 0.88687643 | 3.06E-10   |
| NM_207525 | Opa3 D630048P19Rik Gm1425       | 0.88558151 | 7.43E-20   |
| NM_001033 | Iqsec3 AK122446 BRAG3 mKIA      | 0.88061313 | 5.11E-53   |
| NM_020260 | Arhgap31 5830477L08Rik AU0      | 0.87864315 | 8.36E-24   |
| NM_001081 | Taf1 250kDa AU015687 B4303      | 0.87826694 | 5.81E-54   |
| NM_138682 | Lrrc4 MBAG1 NGL-2 NLG-2 N       | 0.8781914  | 4.61E-15   |
| NM_133697 | Smim14 1110003E01Rik 17001      | 0.87585513 | 1.29E-53   |
| NM_152804 | Plk2 Snk - - 13 13 D2.1 protein | 0.87584406 | 2.88E-36   |
| NM_008300 | Hspa4 70kDa AI317151 APG-2      | 0.87496368 | 1.46E-52   |
| NM_172788 | Sh3rf3 4831416G18Rik Igfbp5-    | 0.87488207 | 3.91E-73   |
| NM_011790 | Arih2 AI843547 ARI2 TRIAD1      | 0.87477208 | 6.18E-45   |
| NM_024457 | Rap1b 2810443E11Rik - 10 D2     | 0.87337341 | 2.05E-44   |
| NM_181317 | Kcns2 E130006J24Rik Kv9.2 -     | 0.87239317 | 2.38E-09   |
| NM_007627 | Cckbr CCK2R CCKR-2 - 7 E3 7     | 0.87071463 | 1.24E-07   |
| NM_146117 | Lrrc26 RP23-132N23.19 RP23-     | 0.86999098 | 1.84E-06   |
| NM_017391 | Slc5a3 AA623876 BF642829 Si     | 0.86977501 | 2.28E-43   |
| NR_038032 | Gm15663 9330159K06 OTTML        | 0.86819237 | 0.00026544 |
| NM_009963 | Cry2 AV006279 D130054K12Ri      | 0.86645787 | 1.62E-42   |
| NM_177618 | Wscd1 mKIAA0523 RP23-223C       | 0.86536314 | 9.10E-34   |
| NM_015747 | Slc20a1 AI607883 Glvr-1 Glvr1   | 0.86219408 | 2.76E-45   |
| NM_023579 | Ipo5 1110011C18Rik 5730478E     | 0.86198905 | 1.11E-45   |
| NM_007785 | Csn1s2a Csn1s2b Csng - 5 E1     | 0.86056284 | 1.84E-07   |
| NR_033533 | Gm12603 OTTMUSG00000007         | 0.85983006 | 8.46E-07   |
| NR_040621 | D930015M05Rik - - 2 2 ncRN      | 0.85918863 | 7.84E-35   |
| NR_028438 | 9230102K24Rik - - 10 D1 10 r    | 0.85654014 | 0.00085176 |
| NM_133738 | Antxr2 2310046B19Rik AW561      | 0.85524267 | 1.24E-25   |
| NM_007772 | Hivep1 Cryabp1 - - 13 A4 13 20  | 0.85451025 | 8.40E-56   |
| NM_144907 | Sesn2 HI95 SEST2 Ses2 RP23-     | 0.85380838 | 4.80E-14   |

|           |                                |            |            |
|-----------|--------------------------------|------------|------------|
| NM_009324 | Tbx2 - RP23-324M14.4 11 C 1    | 0.85349359 | 0.00069087 |
| NM_009215 | Sst SOM SRIF SS Smst - 16 ce   | 0.85253003 | 1.65E-15   |
| NM_133668 | Slc25a3 5730556H19Rik PTP P    | 0.85161498 | 5.82E-36   |
| NM_001012 | Acid - - 8 D3 8 53.04 cM prote | 0.85137495 | 1.32E-08   |
| NM_011286 | Rph3a 2900002P20Rik AU0226     | 0.85099954 | 8.89E-35   |
| NM_134141 | Ciapi1 2810413N20Rik AA617     | 0.85010557 | 2.65E-23   |
| NM_009829 | Ccnd2 2600016F06Rik AI25681    | 0.84953061 | 1.19E-23   |
| NM_007513 | Slc7a1 4831426K01Rik AI4474    | 0.84909457 | 1.72E-48   |
| NM_001163 | Dok5 2700055C10Rik - 2 H3 2    | 0.84877277 | 7.41E-64   |
| NM_010933 | Nppc CNP Ibab - 1 D 1 43.98    | 0.8481392  | 1.20E-07   |
| NM_023598 | Arid5b 4930580B11 5430435G     | 0.84714844 | 3.96E-62   |
| NM_008730 | Nptx1 D11Bwg1004e Np1 RP2      | 0.84499013 | 1.92E-14   |
| NM_007569 | Btg1 AI426953 AW546738 - 1     | 0.84479411 | 8.52E-18   |
| NM_001081 | Fat1 2310038E12Rik AU02343     | 0.8444039  | 1.59E-55   |
| NR_040311 | AI854517 - - 7 D3 7 ncRNA      | 0.84299928 | 7.50E-53   |
| NM_018808 | Dnajb1 0610007I11Rik HSPF1     | 0.84223376 | 4.32E-08   |
| NM_001008 | Adora1 A1-AR A1AR A1R AA1      | 0.84170115 | 1.97E-34   |
| NM_001113 | Sept9 MSF1 Msf PNU TL4 Sint    | 0.8390195  | 1.09E-31   |
| NM_019927 | Arih1 AU021774 Ari Ari1 Hari   | 0.83774977 | 1.32E-61   |
| NM_001081 | Lonrf1 - - 8 A4 8 protein-codi | 0.83769366 | 1.86E-40   |
| NM_078477 | Klf16 AI843742 BTEB4 DRRF -    | 0.83759376 | 2.81E-10   |
| NR_002688 | Gm13363 OTTMUSG00000011        | 0.83521751 | 4.86E-24   |
| NM_013812 | Cdk2ap1 Apc10 Cdkap1 DORC      | 0.83473904 | 5.52E-10   |
| NM_028292 | Ppme1 1110069N17Rik 27000      | 0.83469256 | 1.24E-42   |
| NR_034051 | Snora34 MBI-89 - 15 15 snoR    | 0.8340736  | 0.00060334 |
| NM_173370 | Cds1 4833409J18Rik AI314024    | 0.83394433 | 2.08E-23   |
| NM_030263 | Psd3 4931420C21Rik AI661273    | 0.83364814 | 1.24E-64   |
| NM_001253 | Dnajc12 Jdp1 mJDP1 - 10 B4     | 0.83364497 | 1.66E-07   |
| NM_011305 | Rxra 9530071D11Rik Nr2b1 R     | 0.83347899 | 1.44E-12   |
| NM_001033 | Pak6 4732456M09 RP23-204G      | 0.83324982 | 1.09E-41   |
| NM_009977 | Cst7 Cmap RP23-156P22.1 2      | 0.83295258 | 5.45E-10   |
| NR_003966 | Atp10d 9830145H18Rik ATPVC     | 0.83283281 | 1.42E-24   |
| NM_001033 | 1190002N15Rik GoPro49 HASF     | 0.83278606 | 5.33E-23   |
| NM_009721 | Atp1b1 Atp4b Atpb Atpb-1 NI    | 0.83274003 | 6.24E-57   |
| NM_007625 | Cbx4 MPc2 PC2 RP23-458A23      | 0.829123   | 5.15E-20   |
| NM_177056 | Tmem198 A230078I05Rik Tme      | 0.82613251 | 1.18E-12   |
| NM_001177 | Cyp26b1 CP26 P450RAI-2 - 6     | 0.82513046 | 3.11E-10   |
| NR_045032 | Gdap10 Gdap-ps - 12 A3 12 r    | 0.82460048 | 1.06E-05   |
| NM_001177 | Nfkb2 NF-kappaB2 lyt p49 p4    | 0.82334409 | 0.00060763 |
| NM_001024 | Zfp667 A830025F02Rik Mip1 z    | 0.8229973  | 3.38E-22   |
| NM_133952 | Unc45a AW538196 - 7 D3 7 f     | 0.82289595 | 3.28E-24   |
| NM_010828 | Cited2 AI835299 ER154-like M   | 0.82109326 | 7.85E-16   |

|           |                               |            |            |
|-----------|-------------------------------|------------|------------|
| NM_175935 | G6pc3 0710001K01Rik AU0192    | 0.82098904 | 4.15E-13   |
| NM_007417 | Adra2a AW122659 Adra-2 Adr    | 0.82086623 | 0.00032019 |
| NM_009459 | Ube2h 1500009C23Rik AI1818    | 0.81990474 | 4.30E-56   |
| NM_054043 | Msi2 1700105C15Rik AI451722   | 0.81960337 | 7.59E-61   |
| NM_001025 | Kcnj6 BIR1 GIRK2 KATP2 KCNJ   | 0.81938017 | 3.22E-52   |
| NM_001163 | Evl AI528774 - 12 12 F2 prote | 0.81906999 | 8.31E-60   |
| NM_021424 | Pvrl1 AI835281 AW549174 Cd    | 0.81900857 | 1.46E-37   |
| NM_130796 | Snx18 Snag1 - 13 D2.2 13 prc  | 0.81724472 | 2.34E-24   |
| NM_030262 | Pofut2 2310011G23Rik AI2568   | 0.81651109 | 1.56E-08   |
| NM_011428 | Snap25 Bdr SNAP-25 sp RP23    | 0.8164029  | 2.34E-58   |
| NR_036582 | Dos 9630008F14 R29144/1 mi    | 0.8159384  | 4.10E-32   |
| NM_177716 | AI836003 5630400A08 - 15 F1   | 0.81547878 | 4.20E-06   |
| NM_027915 | Ap2b1 1300012O03Rik AI7889    | 0.81535862 | 4.92E-57   |
| NM_001267 | H2-L H-2L - protein-coding    | 0.81515212 | 0.00080439 |
| NM_201371 | Prmt8 Hrmt1l3 Hrmt1l4 - 6 F3  | 0.81462322 | 2.51E-46   |
| NM_029035 | Spsb1 1110014L01Rik 4930422   | 0.81453977 | 1.09E-11   |
| NM_019411 | Ppp2ca PP2A R75353 RP23-46    | 0.8101121  | 4.30E-40   |
| NM_010317 | Gng4 - 13 A1 13 5.29 cM pr    | 0.80974342 | 4.84E-39   |
| NM_029788 | Rnft1 0610013E23Rik AV0076C   | 0.80940086 | 1.06E-32   |
| NM_198169 | Gmeb2 AI839884 RP23-401M2     | 0.80804687 | 4.63E-36   |
| NM_153569 | Gak D130045N16Rik - 5 F 5 p   | 0.80741097 | 5.86E-45   |
| NM_010108 | Efna3 AW494418 EFL-2 Ehk1-l   | 0.80708098 | 1.71E-10   |
| NM_001040 | Tet2 Ayu17-449 E130014J05Ri   | 0.80653312 | 4.97E-49   |
| NM_001143 | Fam196a B830028B13Rik - 7 F   | 0.80602753 | 5.16E-36   |
| NM_001134 | Plcx2 AW494639 EG433022 -     | 0.80447914 | 1.44E-22   |
| NM_008002 | Fgf10 AEY17 BB213776 Fgf-10   | 0.80431493 | 6.70E-13   |
| NR_046302 | AF357425 MBII-48 - 12 60.5 cl | 0.80246705 | 0.00026065 |
| NR_106184 | Mir3535 mmu-mir-3535 - nc     | 0.80001862 | 0.00032228 |
| NM_001081 | Mamld1 G630014P10Rik - X A    | 0.79661458 | 3.89E-37   |
| NM_008255 | Hmgcr HMG-CoAR Red - 13 D     | 0.79508569 | 9.18E-51   |
| NM_001243 | Clcn5 5430408K11Rik CIC-5 Cl  | 0.79460492 | 2.97E-40   |
| NM_178066 | Tmem198b 1110012D08Rik -      | 0.79371534 | 1.21E-06   |
| NM_026517 | Rpl22l1 3110001N18Rik AU04    | 0.79365099 | 4.87E-07   |
| NM_009367 | Tgfb2 BB105277 Tgf-beta2 Tgf  | 0.79144545 | 1.45E-15   |
| NM_025994 | Efhd2 2600015J22Rik AA4086C   | 0.79010142 | 1.43E-11   |
| NM_177707 | Stac3 9830125E18 - 10 D3 10   | 0.78933954 | 1.54E-11   |
| NM_019502 | Timm10b Fxc1 Tim10b Tim9b     | 0.78931043 | 0.00022588 |
| NM_001080 | Med13 1110067M05Rik D030C     | 0.78694276 | 4.46E-55   |
| NM_001013 | Pfdn4 0610025M10Rik 181006    | 0.78613254 | 2.82E-12   |
| NM_001287 | Nup98 4732457F17 AI849286     | 0.78600337 | 1.27E-48   |
| NM_145491 | Rhoq Arhq TC10A Tc10 - 17 E   | 0.78600307 | 1.00E-26   |
| NM_013873 | Sult4a1 2400007A17Rik AI853   | 0.78591674 | 2.00E-30   |

|           |                               |            |           |
|-----------|-------------------------------|------------|-----------|
| NM_011101 | Prkca Al875142 Pkca RP23-14   | 0.7856958  | 1.10E-57  |
| NM_175171 | Mast4 4930420O11Rik Al6424    | 0.78489801 | 5.90E-52  |
| NM_009289 | Slk 9A2 AV021402 AW411554     | 0.78465265 | 1.20E-38  |
| NM_025967 | D16Ertd472e 1700010I10Rik 2   | 0.78373357 | 3.24E-11  |
| NM_001281 | Cdc20b EG238896 EG622422      | 0.7826215  | 2.54E-06  |
| NM_001164 | Amer2 2600011E07Rik Fam12     | 0.78220824 | 3.73E-11  |
| NM_001109 | Ttyh1 4930459B04Rik 633040    | 0.78190528 | 2.18E-29  |
| NM_018884 | Pdzrn3 1110020C07Rik Al4297   | 0.78150389 | 3.39E-42  |
| NM_009773 | Bub1b AU045529 BUBR1 RP2      | 0.78138004 | 1.19E-05  |
| NM_001164 | Bend4 D330027G24Rik EG666     | 0.78121914 | 2.25E-16  |
| NM_207649 | Rcan2 Csp2 Dscr1l1 MCIP2 ZA   | 0.78014407 | 5.59E-45  |
| NM_013879 | Cabp1 caldendrin - 5 F 5 prot | 0.78005852 | 6.04E-26  |
| NM_033524 | Spred1 5730461F13Rik AL024    | 0.77901534 | 9.74E-45  |
| NM_198034 | Sidt1 AW045928 B830021E24F    | 0.77871727 | 4.57E-34  |
| NM_026547 | Lurap1 1520402A15Rik Lrp35a   | 0.77784283 | 3.75E-05  |
| NM_001110 | Crem ICER ICER - 18 18 A pr   | 0.77753119 | 2.27E-26  |
| NM_008817 | Peg3 AL022617 ASF-1 End4 G    | 0.77708697 | 1.39E-41  |
| NM_177660 | Zbtb10 4832414A18 AU02110     | 0.77660934 | 9.21E-33  |
| NM_016796 | Vamp4 D1Ertd147e - 1 H1 1 7   | 0.7752157  | 8.23E-30  |
| NM_175352 | Unc119b AA407659 Al414892     | 0.77515261 | 5.78E-11  |
| NM_153178 | Ago2 1110029L17Rik 2310051    | 0.77450078 | 1.81E-44  |
| NM_007837 | Ddit3 CHOP-10 CHOP10 chop     | 0.77291047 | 1.01E-14  |
| NM_025436 | Sc4mol 1500001G16Rik C7860    | 0.77267447 | 6.19E-40  |
| NM_001039 | Nolc1 NOPP130 NOPP140 P13     | 0.77256187 | 7.88E-15  |
| NM_172117 | Entpd6 2700026H11Rik Cd39l2   | 0.77184292 | 4.35E-28  |
| NM_026482 | Atp2b1 2810442I22Rik E13011   | 0.77172843 | 9.81E-55  |
| NM_009427 | Tob1 Tob Trob RP23-244C22.1   | 0.77134368 | 5.30E-20  |
| NM_016673 | Cntfr Cntfralpha RP23-167112. | 0.77109238 | 2.88E-22  |
| NM_013463 | Gla Ags RP23-26D22.3 X E-F1   | 0.7697149  | 3.96E-13  |
| NM_015736 | Galnt3 - RP23-306G16.2 2 2 C  | 0.76953834 | 3.35E-13  |
| NM_146150 | Nrd1 2600011I06Rik Al875733   | 0.76869703 | 2.68E-44  |
| NM_011794 | Bpnt1 BPntase - 1 1 H4 prote  | 0.76777458 | 2.05E-16  |
| NM_001033 | Bsph1 Gm767 - 7 A1 7 protei   | 0.76584977 | 0.0009132 |
| NR_045727 | B230209E15Rik - 7 C 7 ncRN    | 0.76349476 | 1.58E-43  |
| NM_028245 | Zfp131 2610109I01Rik AW558    | 0.76335596 | 7.44E-31  |
| NM_001007 | A830010M20Rik Al849226 Kia    | 0.76331623 | 8.24E-29  |
| NM_029113 | 4930447A16Rik - 15 B3.1 15    | 0.76320974 | 2.35E-13  |
| NM_001136 | Rtkn - 6 C3 6 35.94 cM prot   | 0.76319585 | 3.37E-18  |
| NM_015787 | Hist1h1e H1-4 H1e H1f4 H1s-   | 0.76135156 | 2.34E-08  |
| NM_145741 | Gdf10 Bmp3b - 14 B 14 20.8 c  | 0.7610816  | 1.10E-06  |
| NM_016861 | Pdim1 Clim1 mClim1 - 19 19    | 0.76042354 | 3.05E-07  |
| NM_007471 | App Abeta Abpp Adap Ag Cv     | 0.76028924 | 1.04E-54  |

|           |                                |            |            |
|-----------|--------------------------------|------------|------------|
| NM_011994 | Abcd2 ABC39 ALDL1 ALDR AL      | 0.7597242  | 1.04E-05   |
| NM_001104 | Vmn2r19 EG232358 - 6 F2 6      | 0.75969636 | 2.18E-05   |
| NM_009509 | Vil1 Vil - 1 C5 1 38.54 cM pro | 0.75952819 | 3.68E-09   |
| NM_001145 | Hipk3 DYRK6 FIST3 PKY RP24-    | 0.75942155 | 3.76E-41   |
| NM_009062 | Rgs4 AA004315 AA597169 ES      | 0.75884521 | 4.00E-30   |
| NR_015539 | 9630013A20Rik - - 14 D3 14 r   | 0.75869627 | 2.84E-20   |
| NM_183014 | Zfp184 4930500C15Rik RP23-3    | 0.75768287 | 5.43E-11   |
| NM_029083 | Ddit4 5830413E08Rik AA4154     | 0.75763839 | 2.52E-07   |
| NM_013666 | St8sia5 ST8SiaV Siat8e - 18 E3 | 0.75746489 | 3.45E-21   |
| NM_080558 | Ssfa2 5730488C15Rik CS-1 CS    | 0.75722277 | 2.70E-17   |
| NM_008549 | Man2a1 Mana-2 Mana2 Map-       | 0.7559212  | 1.16E-34   |
| NM_001047 | Pard6a 0710008C04Rik 26100     | 0.75520541 | 1.26E-05   |
| NM_026950 | Ociad2 1810027I20Rik - 5 5 D   | 0.75506246 | 4.42E-13   |
| NR_002848 | 6430411K18Rik - - 12 F1 12 n   | 0.75413094 | 4.11E-10   |
| NR_015553 | 9430076C15Rik - - 6 B3 6 ncR   | 0.75322967 | 9.01E-11   |
| NM_008422 | Kcnc3 KSHIID Kcr2-3 Kv3.3 -    | 0.75234112 | 4.28E-17   |
| NM_027198 | Zswim7 2410012H22Rik RP23-     | 0.75204527 | 0.00012516 |
| NR_028266 | BC037032 - - - ncRNA           | 0.75204527 | 0.00012516 |
| NM_172608 | Tmem184b 2610507A11 4732-      | 0.75078595 | 1.04E-31   |
| NM_001168 | R3hdm2 1300003K24Rik AU04      | 0.75063653 | 8.32E-47   |
| NM_008924 | Prkar2a 1110061A24Rik AI317    | 0.74979229 | 2.51E-38   |
| NR_002700 | Gm7334 EG654432 - 17 C 17      | 0.74801796 | 4.05E-13   |
| NM_001286 | Ppp2r1b 2410091N08Rik AI79     | 0.74782826 | 1.58E-29   |
| NM_031872 | Tas1r3 Sac T1r3 RP23-242K15.   | 0.74776984 | 1.74E-07   |
| NM_178804 | Slit2 Drad-1 E030015M03Rik E   | 0.7474977  | 4.18E-52   |
| NM_001037 | Samd4 1700024G08Rik 17001-     | 0.74745701 | 2.00E-41   |
| NM_054057 | Prosc 1700024N20Rik 220000     | 0.74737561 | 2.98E-20   |
| NM_001082 | Efr3b AI852640 C030014M07R     | 0.74726967 | 1.07E-38   |
| NM_011623 | Top2a Top-2 RP23-333D2.5 11    | 0.74717367 | 3.92E-08   |
| NM_027438 | Pnma1 5730402C15Rik - 12 1     | 0.74674556 | 0.00084503 |
| NM_183186 | Foxn3 5430426H20Rik AA5895     | 0.74527195 | 2.75E-48   |
| NM_008737 | Nrp1 C530029I03 NP-1 NPN-1     | 0.74275118 | 2.37E-49   |
| NM_033270 | E2f6 AI462434 E2F6b EMA -      | 0.74201684 | 3.20E-11   |
| NM_139134 | Chodl 3110074E07Rik MT75 P     | 0.7412956  | 0.00047405 |
| NM_001195 | Ppfia1 C030014K08Rik C87158    | 0.74122328 | 2.23E-36   |
| NM_133815 | Lbr AI505894 ic - 1 H5 1 84.8  | 0.74058148 | 1.47E-22   |
| NM_001163 | Plekhhb1 AI315628 PHR1 Phret   | 0.74029386 | 6.30E-14   |
| NM_021462 | Mknk2 2010016G11Rik Gprk7      | 0.74018365 | 8.99E-10   |
| NR_033457 | Gm6225 EG621440 - 18 A1 1      | 0.73991808 | 3.27E-15   |
| NM_009770 | Btg3 ANA tob5 - 16 C3.1 16     | 0.73962441 | 6.37E-13   |
| NM_001110 | Zfp703 1110032O19Rik AI430     | 0.73918797 | 0.00050437 |
| NM_010098 | Opn3 ERO Ecpn - 1 1 H3 prot    | 0.73841288 | 8.63E-24   |

|           |                              |            |            |
|-----------|------------------------------|------------|------------|
| NM_175331 | Nt5dc3 AU040402 AW540062     | 0.73653657 | 2.26E-31   |
| NM_011627 | Tpbg 5T4 AW495680 - 9 E3.1   | 0.73643333 | 8.80E-05   |
| NM_030192 | 4930562C15Rik - 16 A1 16 2   | 0.73601108 | 2.61E-12   |
| NM_001110 | Hist1h2br Gm11277 OTTMUSG    | 0.73416192 | 4.37E-10   |
| NM_011200 | Ptp4a1 AA415290 AU019864     | 0.73388165 | 5.42E-23   |
| NM_080456 | Mrps6 AW046321 - 16 C4 16    | 0.73268967 | 4.45E-36   |
| NM_175770 | Taf7 55kDa Al607308 BB0071   | 0.73251236 | 2.09E-07   |
| NM_026516 | Tmem178 2810417M05Rik Tm     | 0.73233688 | 4.92E-34   |
| NM_001097 | Hist1h2bq Gm13646 OTTMUSG    | 0.73229482 | 4.39E-10   |
| NM_024473 | BC005537 8030460C05Rik C78   | 0.73138369 | 1.51E-28   |
| NM_001003 | Osbp18 AA536976 AA536995 C   | 0.73081552 | 1.97E-45   |
| NM_001142 | Gm10094 ENSMUSG00000061      | 0.72923724 | 6.42E-08   |
| NM_025444 | Taf13 1810004N01Rik 201030   | 0.7291565  | 8.75E-08   |
| NM_029098 | Lmbr1 1110013E13Rik AA415    | 0.72901312 | 3.03E-15   |
| NR_045435 | 2010106C02Rik - 17 17 ncRi   | 0.72892729 | 0.00061624 |
| NM_175250 | 2810007J24Rik - 7 A1 7 proi  | 0.72791542 | 0.00021119 |
| NM_001122 | Zcchc2 9930114B20Rik AW212   | 0.72740065 | 3.98E-27   |
| NM_172286 | 6430548M08Rik AW049007 Ki    | 0.72710438 | 3.50E-28   |
| NM_001190 | Ndfip2 0710001O20Rik 28104   | 0.72551373 | 7.70E-34   |
| NM_023913 | Ern1 9030414B18Rik Al22583C  | 0.72383818 | 8.29E-24   |
| NM_145836 | Irf2bpl 6430527G18Rik Eap1 - | 0.72318986 | 1.45E-15   |
| NM_138606 | Pim2 DXCch3 Pim-2 RP23-443   | 0.72312755 | 3.71E-08   |
| NM_021524 | Nampt 1110035O14Rik Al3144   | 0.72297707 | 2.43E-23   |
| NM_153775 | Ctu2 2310061F22Rik C16orf84  | 0.72240728 | 2.81E-06   |
| NM_011081 | Piga Al194334 Pig-a RP23-202 | 0.72203261 | 0.00094323 |
| NM_008638 | Mthfd2 AW558851 NMDMC -      | 0.721686   | 6.01E-11   |
| NM_022410 | Myh9 Fltn Myhn-1 Myhn1 NM    | 0.72165291 | 3.16E-26   |
| NR_045640 | Gm20199 - 9 9 32.02 cM nc    | 0.72096817 | 1.86E-10   |
| NM_009365 | Tgfb11 ARA55 Hic5 TSC-5 hic  | 0.71966336 | 0.00018244 |
| NR_023846 | Peg3os Apeg3 Peg3as - 7 7 n  | 0.71929891 | 2.78E-06   |
| NM_029947 | Prdm8 4930565F05Rik PFM5 -   | 0.71928521 | 2.14E-18   |
| NM_176972 | Usp37 4932415L06Rik C33000   | 0.71808173 | 3.13E-38   |
| NM_001164 | Slc25a25 1110030N17Rik MCS   | 0.71798437 | 1.49E-25   |
| NM_001166 | Arfgap2 2310032E02Rik Zfp28  | 0.71753845 | 6.55E-15   |
| NR_045775 | Gm15350 OTTMUSG00000020      | 0.71750972 | 0.00027074 |
| NM_007404 | Adam9 AU020942 MDC9 Mltn     | 0.71726572 | 1.29E-29   |
| NR_106171 | Mir1291 mmu-mir-1291 - nc    | 0.71666412 | 0.00079298 |
| NR_073563 | Numb Nb - 12 12 D3 protein-  | 0.71648826 | 6.86E-34   |
| NM_001177 | 0610010K14Rik 1110020A23Ril  | 0.71589023 | 0.00022351 |
| NM_015765 | Hspa14 70kDa HSP70L1 Hsp7C   | 0.71583814 | 4.91E-22   |
| NM_026666 | Ubn1 1110029L11Rik 2610108   | 0.71391173 | 5.17E-28   |
| NM_008900 | Pou3f3 Brn-1 Brn1 Otf8 Skin1 | 0.71357464 | 1.42E-11   |



|           |                                |            |            |
|-----------|--------------------------------|------------|------------|
| NM_028351 | Rspo3 2810459H04Rik AW742      | 0.71351634 | 3.49E-23   |
| NM_207221 | Jmjd1c 5430433L24Rik D63003    | 0.7126737  | 2.37E-46   |
| NR_045373 | 8430422H06Rik - - 18 18 ncR    | 0.71233695 | 2.72E-06   |
| NM_001024 | Bod1 2310022M17Rik BOD2.1      | 0.71215356 | 1.91E-08   |
| NM_011809 | Ets2 AU022856 Ets-2 - 16 C3-1  | 0.71154201 | 3.32E-19   |
| NM_001145 | Dlgap2 6430596N04Rik DAP2      | 0.71042236 | 6.57E-49   |
| NM_022314 | Tpm3 Tm5NM Tpm-5 Tpm5 T        | 0.71021148 | 1.55E-31   |
| NM_021284 | Kras A1929937 K-ras Ki-ras Kra | 0.70880207 | 3.79E-33   |
| NM_008828 | Pgk1 Pgk-1 - X C-D X 47.36 cM  | 0.70860039 | 1.23E-13   |
| NR_045668 | Gm5124 EG331392 RP23-171J      | 0.70855587 | 1.53E-10   |
| NM_001081 | Gli2 AW546128 - 1 E2-E4 1 52   | 0.70828657 | 1.30E-11   |
| NM_011030 | P4ha1 AL022634 P4ha - 10 B4    | 0.70586195 | 5.18E-26   |
| NM_027150 | Mlip 2310046A06Rik A1931782    | 0.70402162 | 9.51E-40   |
| NM_011786 | Aloxe3 e-LOX-3 eLOX-3 RP23-1   | 0.70341844 | 2.23E-07   |
| NM_133778 | Fam131a 2900046G09Rik - 16     | 0.70322118 | 1.89E-14   |
| NM_008973 | Ptn HARP HB-GAM HBBN HBC       | 0.70149779 | 2.36E-34   |
| NM_001142 | Lmo2 Rbtn-2 Rbtn2 Rhom-2 T     | 0.70111362 | 0.00028078 |
| NR_030699 | A630072M18Rik - - 5 5 ncRN     | 0.70062926 | 1.01E-05   |
| NM_001033 | Pls1 A1427122 - 9 E3.3 9 prot  | 0.70049294 | 7.45E-15   |
| NM_198037 | Cachd1 1190007F10Rik A18527    | 0.69982765 | 4.66E-29   |
| NM_001081 | Chd2 2810013C04Rik 2810040     | 0.6998088  | 3.03E-45   |
| NM_025327 | Krtcap2 0610010I12Rik Kcp2 -   | 0.69973825 | 6.91E-05   |
| NM_080795 | Lnx2 9630046H24 AW209022       | 0.69925311 | 9.57E-17   |
| NM_173404 | Bmp3 9130206H07 9530029I0      | 0.69908209 | 2.44E-13   |
| NM_023852 | Rab3c 2700062I01Rik 3110015    | 0.69900955 | 1.84E-45   |
| NM_181072 | Myo1e 2310020N23Rik 91300      | 0.69845421 | 7.57E-14   |
| NM_018745 | Azin1 1700085L02Rik A141494    | 0.69751097 | 4.70E-29   |
| NM_054087 | Slc19a2 AV276020 AW322295      | 0.6966613  | 7.21E-07   |
| NM_001030 | Spry3 Gm1409 Gm391 sprout      | 0.69555003 | 0.0004848  |
| NM_172730 | Ccdc174 C130022K22Rik - 6 D    | 0.69527671 | 1.03E-15   |
| NM_008163 | Grb2 AA408164 Ash RP23-28I     | 0.69485988 | 7.36E-34   |
| NM_028303 | Pdzd11 1810012H22Rik 23100     | 0.69395724 | 0.00028986 |
| NM_153171 | Rgs13 - AL713991.1 1 F 1 62.5  | 0.6928156  | 8.13E-07   |
| NR_015595 | Srrm4os 2410137F16Rik - 5 F    | 0.69206612 | 5.24E-32   |
| NM_010655 | Kpna2 2410044B12Rik IPOA1      | 0.69175193 | 1.63E-08   |
| NM_001033 | Pnrc1 5730463C12Rik B4-2 PR    | 0.69137851 | 4.61E-07   |
| NM_007699 | Chrm4 Chrm-4 M4 RP23-273F      | 0.69085379 | 1.15E-05   |
| NM_019937 | Ccnl1 2610030E23Rik AU0184     | 0.6908112  | 3.92E-23   |
| NM_001163 | Nhs1 1110062M06Rik 643051      | 0.6907286  | 1.07E-22   |
| NM_011057 | Pdgfb PDGF-B Sis - 15 E 15 37  | 0.69054116 | 2.90E-08   |
| NM_001164 | Fbxl16 BC042620 Scirr1 - 17 A  | 0.68741346 | 8.35E-25   |
| NM_008850 | Pitpna Pitpn vb vibrator RP23  | 0.68740154 | 3.63E-36   |

|           |                               |            |          |
|-----------|-------------------------------|------------|----------|
| NM_177597 | March11 9630025C22 - 15 B1    | 0.68714569 | 1.27E-26 |
| NM_008680 | Enah Mena NDPP-1 Ndpp1 W      | 0.68710999 | 2.17E-44 |
| NM_018831 | Dclre1a 2810043H12Rik AU02    | 0.68695894 | 1.66E-07 |
| NM_080843 | Socs4 3110032M18Rik A7300C    | 0.68680359 | 5.52E-08 |
| NM_133838 | Ehd4 2210022F10Rik AI19739C   | 0.68626503 | 1.04E-09 |
| NM_024286 | Popdc3 AA682104 Pop3 - 10 I   | 0.68608241 | 1.30E-05 |
| NM_010598 | Kcnab2 F5 I2rf5 Kcnb3 kv-bet  | 0.68565553 | 3.23E-23 |
| NM_001024 | Adamts15 - - 9 A4 9 protein-c | 0.68557473 | 8.75E-11 |
| NM_020266 | Dnajb2 2700059H22Rik Dnajb1   | 0.68513611 | 6.02E-12 |
| NM_021506 | Sh3rf1 2200003J05Rik Posh R   | 0.68512281 | 3.73E-37 |
| NM_080853 | Slc17a6 2900073D12Rik DNPI    | 0.68491441 | 3.07E-17 |
| NM_001190 | Dbf4 AA545217 Ask - 5 5 A2    | 0.68452731 | 2.68E-06 |
| NM_009046 | Relb shep - 7 A3 7 9.93 cM pi | 0.68251898 | 5.62E-09 |
| NM_001093 | Ptchd1 9630036J22Rik AI8481   | 0.68163619 | 6.56E-30 |
| NM_024414 | Stx1b Stx1b2 Stx1b Syn1b - 7  | 0.68161798 | 6.62E-16 |
| NM_016979 | Prkx PKX1 Pkare RP23-91C19    | 0.68113271 | 2.42E-18 |
| NM_080433 | Fezf2 AI451466 AI852056 Fez   | 0.68063727 | 3.95E-14 |
| NM_009229 | Sntb2 Snt2 - 8 D3 8 53.38 cM  | 0.67993953 | 2.29E-24 |
| NM_183138 | Tet3 B430006D22Rik BC03743    | 0.67988676 | 1.63E-36 |
| NM_145942 | Hmgcs1 B130032C06Rik - 13     | 0.67977284 | 4.82E-39 |
| NR_104355 | Chchd7 1810049H20Rik RP23-    | 0.6796734  | 2.20E-07 |
| NM_001286 | Trim9 - - 12 C3 12 protein-co | 0.67862682 | 4.18E-39 |
| NM_001199 | Rabgef1 Rab5ef Rabex5 Rin2    | 0.67749847 | 5.85E-24 |
| NM_008808 | Pdgfa - - 5 G2 5 77.65 cM prc | 0.67642998 | 2.98E-12 |
| NM_178890 | Abtb2 AW539457 RP23-338B2     | 0.67630369 | 1.20E-16 |
| NM_010319 | Gng7 AI840417 - 10 C1 10 39.  | 0.67553145 | 6.69E-25 |
| NM_001081 | Tsc22d2 1810043J12Rik 55304   | 0.67458607 | 4.50E-33 |
| NM_177631 | BC048502 - - 15 F3 15 proteii | 0.67410721 | 1.33E-06 |
| NM_001081 | Dgkh 5930402B05Rik D130015    | 0.67351991 | 3.00E-38 |
| NR_045614 | 4930413G21Rik - - 7 F3 7 ncF  | 0.67309735 | 1.01E-05 |
| NM_011607 | Tnc AI528729 C130033P17Rik    | 0.67282031 | 2.72E-12 |
| NM_029742 | Klhdc10 2410127E18Rik AI593   | 0.6727622  | 3.51E-37 |
| NM_001159 | Magi3 4732496O19Rik 653040    | 0.67187923 | 2.44E-41 |
| NM_008162 | Gpx4 GPx-4 GSHPx-4 PHGPx r    | 0.67182588 | 2.46E-06 |
| NM_177941 | Ece2 1810009K13Rik 6330509    | 0.67141486 | 2.08E-24 |
| NM_177376 | Myo3b A430065P19Rik RP23-3    | 0.67122536 | 1.17E-22 |
| NM_145505 | Fam160b1 AI450540 mKIAA16     | 0.670495   | 1.06E-20 |
| NM_133819 | Ppp1r15b 1810033K10Rik AI6C   | 0.67004918 | 3.12E-13 |
| NM_178621 | Phyhip1 4921522K17Rik AI267C  | 0.66917574 | 5.10E-27 |
| NM_001113 | Dad1 AI323713 RP23-6A14.1 1   | 0.66845031 | 6.67E-11 |
| NM_001077 | Slc1a2 1700091C19Rik 290001   | 0.6669482  | 1.10E-34 |
| NM_028792 | Josd1 1300006C06Rik mKIAA0    | 0.66647012 | 2.77E-13 |

|           |                                |            |            |
|-----------|--------------------------------|------------|------------|
| NM_001142 | Gm20604 AK010878-Moap1 -       | 0.66612223 | 1.33E-18   |
| NM_199149 | Ppp1r37 Gm158 Lrrc68 - 7 A3    | 0.66553408 | 2.86E-19   |
| NM_172963 | Soga2 1110012J17Rik Ccdc165    | 0.66503178 | 4.90E-30   |
| NM_023668 | Ndel1 2600006O07Rik MITAP1     | 0.66454069 | 1.02E-23   |
| NM_015744 | Enpp2 ATX Npps2 PD-lalpha F    | 0.66369234 | 5.11E-07   |
| NM_001242 | Grin1os E130003G02Rik - 2 2    | 0.66223813 | 3.58E-18   |
| NM_009119 | Sap18 C530046K05Rik D11Ertc    | 0.66220841 | 1.50E-10   |
| NM_172513 | Fam126b C130065N10Rik D1Ei     | 0.66208085 | 5.36E-31   |
| NM_173410 | Gpr26 9630036A11Rik A73002     | 0.66115371 | 2.63E-24   |
| NM_001142 | AK010878 - - 12 12 protein-c   | 0.66055311 | 3.02E-05   |
| NM_009551 | Zfand5 2310057A04Rik 583047    | 0.6595525  | 3.72E-29   |
| NM_001163 | Pgap1 5033403E17Rik 903022     | 0.65932685 | 2.50E-36   |
| NM_183150 | BC003965 Ccsmt1 - 17 A3.3      | 0.65906771 | 0.00011551 |
| NM_007870 | Dnase1l3 DNasegamma Dhp2       | 0.65903874 | 0.0007931  |
| NM_175021 | Samd4b BC042901 - 7 A3 7 p     | 0.6555756  | 2.99E-23   |
| NM_019824 | Arpc3 1110006A04Rik 21kDa      | 0.65423281 | 2.12E-13   |
| NM_029841 | 2510039O18Rik Kiaa2013 RP2     | 0.65365691 | 1.17E-07   |
| NM_023423 | Akirin1 6330407G11Rik RP23-2   | 0.65342515 | 6.80E-15   |
| NM_019472 | Myo10 AW048724 D15Erttd60      | 0.65316096 | 9.62E-19   |
| NR_033624 | 5031434O11Rik AI481280 Gm      | 0.65251192 | 1.45E-08   |
| NM_009744 | Bcl6 Bcl5 - 16 B1 16 15.26 cM  | 0.65218919 | 5.86E-12   |
| NR_002854 | Dlx1as Dlx1os - 2 C2 2 42.58 c | 0.65090855 | 3.87E-14   |
| NM_001081 | Klhl14 6330403N15Rik AI7852    | 0.64984783 | 9.48E-11   |
| NM_028900 | Gcc1 4932417P04Rik - 6 6 A3    | 0.64855733 | 0.00081473 |
| NM_001017 | Kdm6b 1700064E03Rik BC038      | 0.64817633 | 4.38E-21   |
| NM_001161 | Grhl1 LBP-32 MGR Tcfcp2l2 -    | 0.64690281 | 6.32E-06   |
| NM_145852 | Ropn1 ASP AV047578 Akapas      | 0.6461267  | 4.54E-06   |
| NM_184109 | Rtl1 6430411K18Rik Mar Mart    | 0.64588365 | 7.52E-17   |
| NM_146200 | Eif3c 110kDa 3230401O13Rik     | 0.64569823 | 6.34E-22   |
| NR_040651 | 1700125G02Rik - - 4 4 ncRNA    | 0.64564136 | 6.13E-05   |
| NM_008956 | Ptbp1 AA407203 AL033359 HI     | 0.64491402 | 1.90E-12   |
| NM_011424 | Ncor2 N-CoR SMRT SMRte -       | 0.64489074 | 2.82E-31   |
| NM_009722 | Atp2a2 9530097L16Rik D5Wsu     | 0.64381471 | 5.34E-36   |
| NM_001285 | Sgip1 3110007P09Rik SGIP1alp   | 0.64360307 | 2.68E-39   |
| NM_146069 | Nrros E430025L02Rik Lrcc33 L   | 0.64288238 | 0.0002669  |
| NM_177343 | Camk1d A630059D12Rik CKLiK     | 0.64264468 | 7.47E-37   |
| NM_139153 | Agap3 AGAP-3 AV028425 Cen      | 0.64227143 | 4.90E-27   |
| NM_023211 | Usmg5 2010301L15Rik - 19 1     | 0.64224325 | 4.49E-10   |
| NM_022331 | Herpud1 Herp Mifl SUP - 8 C    | 0.6408416  | 2.22E-08   |
| NM_018779 | Pde3a A930022O17Rik C8789      | 0.640411   | 1.26E-20   |
| NM_013500 | Hapln1 BB099155 CLP Crtl1 C    | 0.64038162 | 5.37E-14   |
| NM_008562 | Mcl1 AW556805 Mcl-1 - 3 F2     | 0.63890069 | 1.05E-11   |

|           |                              |            |            |
|-----------|------------------------------|------------|------------|
| NM_133774 | Stard4 4632419C16Rik 903021  | 0.63883878 | 3.06E-14   |
| NM_133915 | Pxn AW108311 AW123232 Pa     | 0.63752588 | 9.93E-12   |
| NM_028207 | Dusp3 2210015O03Rik 503143   | 0.63743728 | 4.33E-13   |
| NM_027870 | Armcx3 1200004E24Rik AI450   | 0.63646313 | 2.06E-09   |
| NM_207277 | Msantd1 A930005I04Rik Gm14   | 0.63627351 | 0.00065063 |
| NM_024287 | Rab6a 2610028L11Rik AA4196   | 0.63610823 | 1.87E-29   |
| NM_029440 | Wdr95 4930434E21Rik - 5 G3   | 0.63466621 | 1.92E-09   |
| NM_001081 | Sc1t1 2610207F23Rik 4931421f | 0.63345905 | 2.02E-28   |
| NM_011385 | Ski 2310012I02Rik 2610001A1  | 0.63298862 | 5.51E-33   |
| NM_175091 | Tnks 4930554K12Rik AI662855  | 0.63266836 | 7.12E-33   |
| NM_020010 | Cyp51 AI426508 CYPLI Cyp51a  | 0.63238295 | 3.14E-28   |
| NM_020259 | Hhip Hhip1 - 8 C3 8 37.95 cM | 0.63231854 | 0.00015765 |
| NM_178740 | Slitrk4 6430513G13 D930039I  | 0.63202281 | 1.30E-14   |
| NM_001164 | Coro2a 9030208C03Rik AI5635  | 0.63096296 | 1.56E-23   |
| NM_001005 | Zfp69 Gm1029 Krab2 Zfp63 R   | 0.63041792 | 0.0002072  |
| NM_172714 | Lin54 4832414L08 AI461788 n  | 0.629353   | 4.43E-16   |
| NM_001081 | Ankrd44 4930444A19Rik A130   | 0.62919934 | 1.10E-34   |
| NM_133840 | Clp1 AI462438 Heab RP23-39   | 0.62874548 | 0.0008928  |
| NM_001142 | Slc6a8 AA589632 CRT CRTR C   | 0.62844801 | 5.06E-11   |
| NM_023320 | Plekho1 2810052M02Rik CKIP-  | 0.62808259 | 8.04E-08   |
| NM_172812 | Htr2a E030013E04 Htr-2 Htr2  | 0.62742823 | 1.45E-10   |
| NM_001033 | Garem C86169 Fam59a Gm94     | 0.62741209 | 9.33E-31   |
| NM_025804 | Tcf25 1100001J13Rik 1810041  | 0.62707526 | 4.35E-27   |
| NM_010439 | Hmgb1 DEF HMG-1 Hmg1 SBI     | 0.62656609 | 1.63E-09   |
| NM_153142 | Slc35e4 A330108F03Rik AI414  | 0.62561944 | 1.18E-05   |
| NM_026929 | Chac1 1810008K03Rik RP23-4   | 0.62557853 | 0.0005145  |
| NM_144551 | Trib2 AW319517 TRB-2 TRB2    | 0.62482136 | 2.72E-12   |
| NM_001001 | Tpm4 2610528G24Rik - 8 B3.3  | 0.62475181 | 5.98E-11   |
| NM_001159 | Ppm1b PP2CB - 17 E4-E5 17 5  | 0.62437872 | 1.01E-25   |
| NM_028023 | Cdca4 2410018C03Rik HEPP S   | 0.62425147 | 1.78E-06   |
| NM_028705 | Herc3 5730409F18Rik AI64660  | 0.62403432 | 4.92E-28   |
| NM_008084 | Gapdh Gapd - 6 F2 6 59.32 cN | 0.62335438 | 1.21E-06   |
| NM_001165 | Fndc7 E230011A21Rik RP23-3   | 0.62316161 | 0.00079651 |
| NM_176860 | Ubash3b 2810457I06Rik BB12   | 0.62296797 | 3.00E-27   |
| NM_030689 | Nptxr 1200009K17Rik 170003   | 0.62268742 | 1.20E-21   |
| NM_175334 | Maml1 AI644666 AW743257 I    | 0.62196959 | 2.23E-16   |
| NM_033144 | Sept8 AW046166 Sep1 mKIAA    | 0.62186093 | 1.93E-13   |
| NM_009484 | Uty Hydb mKIAA4057 - Y A1    | 0.6215141  | 1.87E-25   |
| NM_053080 | Aldh1a3 ALDH6 RALDH3 V1 -    | 0.62112766 | 9.02E-05   |
| NM_183038 | Defb39 BD-39 - 8 A1.3 8 prot | 0.62091242 | 0.00023559 |
| NM_009623 | Adcy8 AC8 AW060868 - 15 D    | 0.62065214 | 3.55E-33   |
| NM_080575 | Acss1 1110032O15Rik AI78897  | 0.6206088  | 6.74E-16   |

|           |                                |            |            |
|-----------|--------------------------------|------------|------------|
| NM_172637 | Hectd2 4921524L07 A630025C     | 0.62040451 | 2.50E-24   |
| NM_198292 | Tex2 4930568E07Rik AI553404    | 0.61957701 | 5.88E-25   |
| NM_008102 | Gch1 GTP-CH GTPCH Gch - 14     | 0.61950047 | 0.00021794 |
| NM_010195 | Lgr5 FEX Gpr49 - 10 D2 10 pi   | 0.61941522 | 3.54E-15   |
| NM_001114 | Fnbp1 2610318I01Rik AW548      | 0.61924304 | 2.69E-35   |
| NM_015781 | Nap1l1 AA407126 AI256722 D     | 0.61884    | 7.84E-25   |
| NM_001286 | Jund Jund1 - 8 C2 8 34.15 cM   | 0.61881352 | 1.72E-10   |
| NM_007479 | Arf4 AA407803 - 14 A3 14 16.   | 0.61817375 | 3.66E-21   |
| NM_133777 | Ube2s 0910001J09Rik 672046     | 0.61804799 | 7.78E-05   |
| NM_001163 | Stx11 5830405C08Rik - 10 A1    | 0.61766854 | 0.00037686 |
| NM_001256 | Epha10 A330090H18 RP23-16      | 0.61766512 | 1.38E-22   |
| NR_033548 | D030047H15Rik Gm15924 OT       | 0.61729673 | 1.95E-15   |
| NM_016749 | Mybph AI385643 MyBP-H - 1      | 0.617198   | 3.92E-08   |
| NM_053124 | Smarca5 4933427E24Rik D030     | 0.61681186 | 3.39E-22   |
| NM_009466 | Ugdh Udpgdh - 5 C3.1 5 33.67   | 0.61578286 | 5.27E-15   |
| NM_008937 | Prox1 A230003G05Rik - 1 H6     | 0.61561111 | 3.90E-09   |
| NM_016748 | Ctps Ctps1 RP23-106K5.3 4 D2   | 0.61504821 | 1.30E-15   |
| NM_001287 | Atf4 Atf-4 C/ATF CREB2 TAXR    | 0.6143307  | 8.90E-13   |
| NM_010813 | Mnt Rox bHLHd3 RP23-174M1      | 0.61420628 | 9.25E-14   |
| NM_177628 | Fam167a A030013D21 - 14 D1     | 0.61320543 | 3.02E-06   |
| NM_008618 | Mdh1 B230377B03Rik D17921      | 0.61312705 | 2.02E-16   |
| NM_133220 | Sgk3 2510015P22Rik A330005     | 0.6130871  | 1.54E-21   |
| NM_177282 | Mical2 5330438E18Rik 953006    | 0.61253132 | 2.34E-30   |
| NM_007594 | Calu 9530075H20Rik - 6 A3.3    | 0.6123444  | 3.15E-17   |
| NM_019717 | Atl2 2010110I21Rik AA407293    | 0.61230185 | 4.74E-23   |
| NR_045441 | 4930558G05Rik - X X ncRNA      | 0.61103263 | 3.97E-05   |
| NM_153541 | Zbtb8b AV220464 BC023839 E     | 0.61065169 | 0.00044263 |
| NM_133665 | Mef2d C80750 - 3 F1 3 38.78    | 0.61005386 | 1.12E-19   |
| NM_024188 | Oxct1 2610008O03Rik Oxct O     | 0.60992477 | 4.04E-31   |
| NM_009216 | Sstr1 SRIF-2 SS-1-R SS1-R SS1  | 0.60926859 | 8.48E-06   |
| NM_138756 | Slc25a36 C330005L02Rik - 9 E   | 0.60858053 | 1.07E-21   |
| NM_018869 | Grk5 Gprk5 - 19 D3 19 56.52    | 0.60851744 | 6.21E-22   |
| NM_001286 | Fam65b - RP23-461O24.1 13      | 0.60851257 | 2.04E-28   |
| NM_019769 | Chp1 1500003O03Rik AA9600      | 0.60842379 | 5.96E-18   |
| NM_177075 | Fndc9 C030019I05Rik RP23-37    | 0.60836698 | 2.78E-07   |
| NM_172734 | Stk38l 4930473A22Rik B23032    | 0.60694288 | 2.99E-13   |
| NM_019930 | Ranbp9 IBAP-1 Ibap1 RanBPM     | 0.60691265 | 1.18E-28   |
| NM_019676 | Plcd1 AW212592 C79986 - 9 f    | 0.60689585 | 6.08E-05   |
| NM_001025 | Lrig2 4632419I10Rik BB09693    | 0.6063249  | 4.48E-27   |
| NM_001170 | Trim66 Kiaa0298-hp Tif1d - 7   | 0.60618686 | 2.11E-10   |
| NM_001005 | Ypel4 - RP23-399J8.2 2 D 2 pi  | 0.60575443 | 1.41E-05   |
| NM_001079 | Srsf5 Sfrs5 - 12 12 D2 protein | 0.60571863 | 5.12E-15   |

|           |                               |            |            |
|-----------|-------------------------------|------------|------------|
| NM_175423 | Orai1 D730049H07Rik Tmem1     | 0.60566489 | 3.63E-06   |
| NM_145123 | Crtac1 2810454P21Rik AW047    | 0.60475484 | 9.68E-24   |
| NM_177089 | Tacc1 4833447E04Rik AA9602    | 0.6045168  | 1.19E-20   |
| NM_027323 | Srrd 2810002G02Rik Srr1 - 5   | 0.60432588 | 1.75E-05   |
| NM_009951 | Igf2bp1 AL024068 AW549074     | 0.60414913 | 3.02E-06   |
| NM_010415 | Hbegf AW047313 Dtr Dts Heg    | 0.60365552 | 0.00018994 |
| NM_021395 | Hyou1 AI415631 CBP-140 Cab    | 0.60289076 | 1.76E-11   |
| NM_009834 | Ccrn4 AU043840 Ccr4 noctur    | 0.60268722 | 8.98E-17   |
| NM_175937 | Cpeb2 A630055H10Rik Cpe-bp    | 0.60240362 | 1.69E-28   |
| NM_001039 | Rbms2 2610315E04Rik Scr3 -    | 0.60194993 | 7.76E-10   |
| NM_138660 | Casc3 Btz Mln51 RP23-395E1    | 0.60182025 | 9.60E-21   |
| NM_001038 | Adar AV242451 Adar1 mZaAD     | 0.60147476 | 1.72E-25   |
| NM_008285 | Hrh1 Bphs H1R HH1R Hir - 6    | 0.60128191 | 6.33E-11   |
| NM_198962 | Hctr2 OX2R mOX2aR mOX2bl      | 0.60123655 | 3.69E-23   |
| NM_008449 | Kif5c KINN Khc NKHC NKHC2     | 0.6012031  | 1.29E-33   |
| NM_139294 | Braf 9930012E13Rik AA12055    | 0.60045669 | 2.06E-31   |
| NM_144944 | Prokr2 B830005M06Rik EG-VE    | 0.60002344 | 1.81E-08   |
| NM_052994 | Spock2 AA407235 Gcap26 mK     | 0.59993365 | 9.23E-23   |
| NM_010140 | Epha3 AW492086 Cek4 ETK1      | 0.59980919 | 2.24E-33   |
| NM_175260 | Myh10 5730504C04Rik 93301     | 0.5998009  | 9.23E-32   |
| NM_009194 | Slc12a2 9330166H04Rik Nkcc1   | 0.59898653 | 1.75E-25   |
| NM_010072 | Dpm1 AI118379 AI194292 RP     | 0.5988584  | 6.44E-15   |
| NM_007726 | Cnr1 CB-R CB1 CB1R RP24-4     | 0.59876344 | 1.68E-25   |
| NM_173764 | Tapt1 4932414K18Rik - 5 B3    | 0.59813385 | 1.01E-21   |
| NM_177876 | Vps37b 2300007F24Rik AI415    | 0.59803402 | 4.85E-14   |
| NM_013490 | Chka CK CK/EK-alpha Chetk-al  | 0.59798453 | 3.94E-25   |
| NM_033565 | Aff4 AF5Q31 Alf4 Laf4 MCEF    | 0.59717485 | 5.35E-31   |
| NM_152915 | Dner A930026D19Rik BET Bre    | 0.59657188 | 4.68E-34   |
| NM_007641 | Ms4a1 AA960661 Cd20 Ly-44     | 0.59594308 | 0.00016415 |
| NM_027782 | Kctd6 5430433B02Rik AU0442    | 0.59539695 | 2.14E-06   |
| NM_010251 | Gabra4 Gabra-4 - 5 C3.2 5 pr  | 0.59522501 | 4.45E-24   |
| NM_001145 | Adtrp 9530008L14Rik - 13 A4   | 0.59497402 | 9.99E-05   |
| NM_172429 | Smndc1 2410004J23Rik 49334    | 0.59440447 | 2.10E-09   |
| NM_001174 | Map3k9 E130314H24Rik Mlk1     | 0.5943608  | 5.40E-25   |
| NM_001029 | Unc13a 2410078G03Rik Munc     | 0.59316582 | 7.94E-29   |
| NM_011240 | Ranbp2 A430087B05Rik AI256    | 0.59311192 | 3.27E-25   |
| NM_019675 | Stmn4 Lag R75359 RB3 - 14     | 0.59293501 | 6.73E-21   |
| NM_001098 | Tox2 AI851523 AV026525 BI9    | 0.59271536 | 4.82E-15   |
| NM_008214 | Hars MMHRS - 18 B2 18 prot    | 0.59250586 | 7.88E-14   |
| NM_144857 | Rrp36 - - 17 C 17 protein-cod | 0.59237664 | 7.07E-06   |
| NM_001190 | Dact1 4921528D17Rik AI1156    | 0.59084324 | 7.02E-07   |
| NR_026888 | 4930488L21Rik 4930452J22Rik   | 0.590822   | 2.41E-06   |

|           |                                |            |            |
|-----------|--------------------------------|------------|------------|
| NM_019409 | Omg - RP23-271B20.3 11 B5 1    | 0.58969992 | 8.31E-09   |
| NM_001163 | Lym5 4930469P12Rik AL0228      | 0.58964577 | 1.54E-08   |
| NM_183144 | Inpp5a - - 7 F4 7 protein-codi | 0.58964568 | 1.56E-21   |
| NM_027373 | Afap1 2600003E23Rik 963004     | 0.58962009 | 3.05E-27   |
| NM_009412 | Tpd52 AI043038 md52 - 3 3      | 0.58913574 | 1.10E-18   |
| NM_012058 | Srp9 9kDa - 1 H5 1 protein-cc  | 0.58899305 | 2.66E-05   |
| NM_011241 | Rangap1 C79654 Fug1 mKIAA:     | 0.58887237 | 2.00E-18   |
| NM_207176 | Tes D6Ertd352e TESS Tes1 Te    | 0.58876059 | 4.69E-15   |
| NM_144945 | Lgi2 mKIAA1916 - 5 C1 5 prot   | 0.58863869 | 2.93E-14   |
| NM_172821 | Map3k13 C130026N12Rik LZK      | 0.58821475 | 1.12E-13   |
| NM_172947 | Lsm12 1110032E16Rik 111005     | 0.58660608 | 4.66E-14   |
| NM_022323 | Moap1 AA987038 Map-1 Pnm       | 0.58629703 | 1.14E-06   |
| NM_011020 | Hspa4l 94kDa AI461691 APG-1    | 0.5855638  | 4.69E-15   |
| NM_134002 | Csnk1g2 2810429I12Rik AI463:   | 0.58292739 | 9.01E-11   |
| NM_181988 | Rerg - - 6 G1 6 protein-codin  | 0.58170478 | 5.92E-16   |
| NM_009637 | Aebp2 AU023766 B230313N05      | 0.58112693 | 5.95E-20   |
| NM_021366 | Klf13 0610043C13Rik 9430029    | 0.58071235 | 1.91E-23   |
| NM_001093 | Myadm D7Wsu62e - 7 A1 7 1.     | 0.58002519 | 2.19E-09   |
| NM_001003 | Senp7 2410152H17Rik 281041     | -0.5807685 | 4.97E-23   |
| NM_145486 | March2 9530046H09Rik MARC      | -0.5810384 | 7.20E-11   |
| NR_045074 | A330102I10Rik - - 13 13 ncRN   | -0.5816055 | 2.20E-07   |
| NM_001113 | Amn1 5830467E07Rik A23008:     | -0.5817493 | 9.66E-18   |
| NM_130892 | Rtn4ip1 D10Ertd690e NIMP -     | -0.5821413 | 7.44E-05   |
| NR_045746 | Gm10865 ENSMUSG00000075:       | -0.5827343 | 0.00042309 |
| NM_001190 | Ankrd29 G630054C21 G63005:     | -0.583129  | 5.40E-06   |
| NM_029394 | Snx24 2810011K15Rik 573043:    | -0.583215  | 2.38E-13   |
| NM_029624 | Lmf1 2400010G15Rik AW8220      | -0.5833706 | 1.22E-10   |
| NM_206534 | Churc1 1700030P15Rik My015     | -0.5837392 | 1.35E-06   |
| NM_001286 | Scyl3 1200016D23Rik 6030457    | -0.5845257 | 3.11E-09   |
| NM_201364 | BC055324 - - 1 H2.2 1 proteir  | -0.5848881 | 2.36E-06   |
| NM_001145 | Crocc - RP23-183L1.6 4 D3 4    | -0.5867239 | 3.23E-08   |
| NM_025617 | Tceanc2 2210010B22Rik 2210     | -0.5872685 | 7.76E-09   |
| NM_178889 | Zscan29 AW125441 Zfp690 RF     | -0.5874132 | 2.42E-05   |
| NM_026446 | Rgs19 2610042F04Rik AI32484    | -0.5875339 | 0.00023812 |
| NM_001003 | Zc4h2 Gm372 mKIAA1166 RP2      | -0.5876136 | 8.63E-05   |
| NM_145484 | Zfp758 BC021442 - 17 A3.3 1:   | -0.5878936 | 0.00013526 |
| NM_026788 | Mthfd2l 1110019K23Rik C630     | -0.5882664 | 3.19E-12   |
| NM_001168 | Tyw3 5230400J09Rik - 3 H4 3    | -0.5887837 | 4.97E-05   |
| NM_175324 | Acad11 5730439E10Rik AI987:    | -0.5891863 | 1.24E-05   |
| NM_146090 | Zadh2 C530046K17Rik - 18 E4    | -0.5891976 | 0.00015202 |
| NM_009200 | Slc1a6 EAAT4 - 10 C1 10 39.7:  | -0.5895483 | 5.00E-06   |
| NM_178722 | Zfp438 9430031G09 9430091N     | -0.5897127 | 1.51E-11   |

|           |                              |            |            |
|-----------|------------------------------|------------|------------|
| NM_025892 | Cep19 1500031L02Rik AI42893  | -0.589884  | 0.0008279  |
| NM_029057 | Tbc1d30 4930505D03Rik - 10   | -0.5906075 | 4.47E-16   |
| NM_001033 | Gm166 - - 7 F3 7 protein-cod | -0.5912663 | 0.00018405 |
| NM_019687 | Slc22a4 Octn1 RP23-354D12.1  | -0.5921949 | 0.00058296 |
| NM_029847 | Arsk 2810429K17Rik 4833414C  | -0.5922833 | 2.89E-05   |
| NM_177111 | Ccdc66 E230015L20Rik - 14 A3 | -0.5936722 | 3.22E-13   |
| NR_033324 | BC065397 R75336 parl7 - X F: | -0.5950611 | 1.07E-05   |
| NM_025909 | Oma1 2010001O09Rik MPRP-1    | -0.5951125 | 3.01E-09   |
| NM_178082 | Insig2 2900053I11Rik C730043 | -0.5955334 | 1.23E-09   |
| NM_001100 | 4930505A04Rik - RP23-145N4.  | -0.5974048 | 0.00056096 |
| NM_010725 | Lmx1b LMX1.1 LMX1.2 RP23-6   | -0.5977343 | 0.00086826 |
| NM_016912 | Cdkl2 5330436L21Rik AI50522! | -0.5993535 | 5.66E-14   |
| NM_009662 | Alox5 5-LO 5-LOX 5LO 5LX AI: | -0.6005957 | 0.00019133 |
| NM_133977 | Trf AI266983 Cd176 HP Tf Tfr | -0.6007981 | 0.00077265 |
| NM_001039 | Parp14 1600029O10Rik ARTD8   | -0.6013374 | 0.00010819 |
| NM_001243 | 2010315B03Rik BC029716 - 9   | -0.60182   | 1.63E-09   |
| NM_001029 | Pik3cd 2410099E07Rik 261020  | -0.6022742 | 6.64E-10   |
| NM_016845 | Acrbp OY-TES-1 sp32 - 6 6 F2 | -0.6030344 | 2.24E-05   |
| NM_013851 | Abca8b Abca8 RP23-102B2.1 :  | -0.6034347 | 2.89E-08   |
| NM_001085 | Gm13251 OTTMUSG000000110     | -0.6045538 | 5.30E-05   |
| NM_172515 | Zbbx 4931432L23 - 3 E3 3 prc | -0.6048615 | 5.02E-06   |
| NM_001277 | Adck1 2610005A10Rik - 12 12  | -0.6050101 | 2.26E-14   |
| NM_026951 | Pex11g 1810022F11Rik 181004  | -0.6050178 | 0.00025958 |
| NM_001081 | Frmppd1 BC031840 mKIAA0967   | -0.6050299 | 2.34E-06   |
| NM_029578 | Tgds 2610017J16Rik 2610025N  | -0.6062588 | 1.18E-06   |
| NM_001037 | Cgn 6330408J11Rik AI647528   | -0.6070912 | 1.40E-06   |
| NM_001164 | Zfp961 A230105L22Rik BC0657  | -0.6073471 | 1.88E-08   |
| NM_178738 | Prss35 6030424L22Rik P3D9 -  | -0.6074412 | 0.00028057 |
| NM_153131 | Unc5a Unc5h1 mKIAA1976 - 1   | -0.6103362 | 4.09E-14   |
| NM_145595 | Cbr4 A730083J17Rik BC009118  | -0.6113592 | 0.00052139 |
| NM_029407 | Fam227a 4933432B09Rik - 15   | -0.6133168 | 2.16E-15   |
| NM_001285 | Carf Als2cr8 ECBRC-FC1 ECBRC | -0.6142113 | 1.56E-13   |
| NM_029434 | Lca5 4930431B11Rik 5730406C  | -0.6146312 | 2.58E-15   |
| NM_001039 | Zfp951 C230055K05Rik - 5 E5  | -0.6150499 | 1.21E-09   |
| NM_207267 | Tmsb15 4930488E11Rik Tb15r   | -0.6156787 | 0.00071854 |
| NM_134042 | Aldh6a1 1110038I05Rik AI3146 | -0.6158607 | 8.65E-10   |
| NR_037984 | Gm19461 - - 1 E4 1 57.91 cM  | -0.6159555 | 4.94E-07   |
| NM_009177 | St3gal1 5330418N22Rik AI467C | -0.616024  | 3.58E-23   |
| NM_009738 | Bche C730038G20Rik - 3 E3 3  | -0.6165977 | 1.88E-08   |
| NM_001163 | Fam151b 4930405M20Rik - 13   | -0.6172908 | 9.87E-06   |
| NM_011196 | Ptger3 EP3 Pgerep3 Ptgerep3  | -0.6176331 | 1.92E-13   |
| NM_080850 | Pask mKIAA0135 - 1 D 1 prot  | -0.6179103 | 7.37E-05   |



|            |                               |            |            |
|------------|-------------------------------|------------|------------|
| NM_001081: | Prss36 C330007D15Rik - 7 F3   | -0.6187618 | 5.17E-06   |
| NM_146247  | Mettl22 - - 16 A1 16 protein- | -0.6188575 | 2.27E-07   |
| NM_026515  | 2810417H13Rik AA409629 Ns5    | -0.6194337 | 1.50E-05   |
| NM_145618  | Narg2 B230343B06Rik CT0097    | -0.620314  | 3.73E-10   |
| NM_026367  | Gpatch2 5830433G22Rik 5830    | -0.6204075 | 8.06E-18   |
| NM_008650  | Mut D230010K02Rik Mcm - 1     | -0.62129   | 1.06E-05   |
| NR_030700  | 4831440E17Rik - - 5 A3 5 ncR  | -0.6213383 | 0.00046402 |
| NM_010753  | Mxd4 2810410A03Rik Mad4 b     | -0.6221697 | 2.27E-06   |
| NM_145496  | Dak BC021917 - 19 A 19 prot   | -0.6226677 | 0.00041168 |
| NR_015523  | A730017L22Rik - - 2 F1 2 ncR  | -0.6250075 | 2.42E-15   |
| NM_026592  | B230118H07Rik NWC RP23-32     | -0.6256342 | 2.20E-07   |
| NM_172689  | Ddx58 6430573D20Rik C33002    | -0.6271465 | 5.45E-08   |
| NM_172467  | Zc3hav1 B130055L09Rik E430    | -0.6271674 | 0.00017499 |
| NM_153391  | Wdr19 C330027H04Rik D3300     | -0.6276445 | 1.19E-11   |
| NM_019427  | Epb4.1 4b 6430543G08Rik AA5   | -0.6283988 | 9.83E-09   |
| NR_024590  | Tmem194b 5330401P04Rik 98     | -0.6286754 | 4.24E-09   |
| NM_028626  | Mcee 1110007A04Rik - 7 7 C    | -0.6298761 | 0.00042744 |
| NM_001253  | Tmem205 - - 9 A3 9 protein-c  | -0.6300801 | 6.25E-07   |
| NM_001163  | Cd160 AU045688 By55 - 3 F2    | -0.6301822 | 5.17E-05   |
| NM_178875  | Zfp935 8430426H19Rik Es113    | -0.6310278 | 2.51E-07   |
| NM_023266  | Zfp120 AI315103 E030042N05    | -0.6311441 | 4.73E-07   |
| NM_001145  | Pigv B330013B03 D430024F16    | -0.6316808 | 0.00014887 |
| NM_146231  | Zfp825 - - 13 C1 13 protein-c | -0.6325582 | 0.00090588 |
| NM_001081: | Alg6 E230028F23Rik RP23-35D   | -0.6326588 | 1.99E-11   |
| NM_177561  | Usp46 1190009E20Rik 241001    | -0.6335111 | 6.02E-19   |
| NM_027534  | Kdsr 6330410P18Rik 9430079E   | -0.6339408 | 1.14E-13   |
| NM_175515  | Intu 9230116I04Rik 9430087H   | -0.6346492 | 8.66E-11   |
| NM_145443  | L2hgdh BC016226 - 12 C2 12    | -0.6347605 | 4.62E-06   |
| NR_015491  | A630089N07Rik - - 16 C4 16 i  | -0.6352859 | 2.42E-06   |
| NR_075104  | Etfb 0610009I16Rik 2810441H   | -0.6357357 | 0.00077369 |
| NM_001164: | Gm5415 EG408191 Senp14 -      | -0.6361815 | 6.92E-05   |
| NM_172466  | Adamts18 9630038L21 ADAM7     | -0.6365947 | 1.53E-11   |
| NM_146009  | Cep290 BC004690 Nphp6 b2b     | -0.6369254 | 2.50E-14   |
| NM_028307  | Tdrkh 2700091C21Rik Tdrd2 -   | -0.6378746 | 3.02E-10   |
| NM_001111  | (Runx1t1 Cbfa2t1h ETO MTG8    | -0.6396321 | 6.24E-36   |
| NM_146039  | Wdr60 D430033N04Rik - 12 F:   | -0.6396883 | 9.78E-12   |
| NM_199302  | Lrsam1 - RP23-365F1.1 2 B 2   | -0.6398479 | 1.22E-12   |
| NM_026546  | Fam173b A930016P21Rik AA9:    | -0.6398954 | 1.07E-05   |
| NM_198001  | 1110008P14Rik C79326 RP23-:   | -0.6414461 | 0.00065629 |
| NM_015795  | Fbxo16 4932435C24Rik Fbx16    | -0.6414806 | 6.48E-12   |
| NM_173746  | Triqk C130086A10 Gm11818 C    | -0.6423861 | 4.16E-07   |
| NM_027801  | 2610015P09Rik 8430422M09Ri    | -0.6433887 | 3.30E-09   |

|                                           |            |            |
|-------------------------------------------|------------|------------|
| NM_001081: Zfand4 2810002D23Rik AV260     | -0.6446501 | 9.58E-12   |
| NM_001033: Acmsd - - 1 E3 1 protein-codi  | -0.6451701 | 0.00021622 |
| NM_001242: 9830147E19Rik C330019L16Rik    | -0.6453827 | 2.15E-07   |
| NM_145960 Mtrf1 A830062K05Rik Mtrf1-      | -0.6456981 | 1.96E-05   |
| NM_177743 Fam198a C730027P07Rik - 9 F     | -0.6458885 | 0.00010282 |
| NM_028260 Immp1 1500034J20Rik 26105:      | -0.6476569 | 4.88E-19   |
| NM_183096 Ttc29 1700031F13Rik - 8 C1 8    | -0.6488842 | 0.00049267 |
| NM_197988 1190005I06Rik - - 8 E1 8 prot   | -0.6508679 | 0.0002072  |
| NM_011629 Nr2c1 4831444H07Rik 80.3 Ee     | -0.6523171 | 9.28E-11   |
| NM_144820 Ccdc28a 1700009P13Rik AI480     | -0.6531179 | 0.00014421 |
| NM_001008: Kbtbd8 AU040152 SSEC-51 SS     | -0.6535943 | 9.69E-05   |
| NM_172581 Fam161b 9330169D17 983016       | -0.6553991 | 1.96E-06   |
| NM_001001: Tmem204 - - 17 A3.3 17 prot    | -0.6556626 | 8.35E-05   |
| NM_183254 Fam229b 1700025K23Rik - 10      | -0.6564704 | 8.62E-06   |
| NM_026348 Itgb3bp 4930471O16Rik AU02:     | -0.6569458 | 3.39E-09   |
| NM_178749 Stk32a A930015B13Rik YANK1      | -0.6586326 | 2.83E-10   |
| NM_013472 Anxa6 AW107198 Anx6 AnxVI       | -0.6587029 | 1.18E-16   |
| NR_015502 E030003E18Rik 1700127G21Ril     | -0.6588187 | 0.00085268 |
| NM_029343 Spata9 1700030K01Rik 493059     | -0.6613037 | 0.00021152 |
| NM_009354 Tert EST2 TCS1 TP2 TR TRT -     | -0.6626213 | 0.00066676 |
| NM_019789 Kcnp3 4933407H12Rik AI4138      | -0.6626852 | 7.18E-10   |
| NM_021504 Ngly1 1110002C09Rik PNGase      | -0.6643393 | 4.24E-15   |
| NM_198003 Zfp946 1300003B13Rik - 17 A:    | -0.6645594 | 5.04E-09   |
| NM_175105 Aqp11 1700015P13Rik AI6489:     | -0.6646194 | 5.96E-05   |
| NM_183183 Gprin3 C030038J10Rik C73002     | -0.6646816 | 1.28E-10   |
| NM_001024: Zfp873 - - 10 C1 10 protein-c  | -0.6655033 | 6.75E-05   |
| NM_010146 Epm2a TG-B Tg(TcraK,TcrbK)TC    | -0.665732  | 3.35E-17   |
| NM_172938 Scml4 9330161D17 mFLJ00197      | -0.6658898 | 7.54E-15   |
| NM_026613 Ccdc34 2810027O19Rik 49305      | -0.6689385 | 1.77E-09   |
| NM_010180 Fbln1 - - 15 15 E-F protein-co  | -0.6697759 | 1.99E-07   |
| NM_028319 Zfp518a 2810401C22Rik 63304     | -0.6704715 | 1.36E-09   |
| NM_016863 Fkbp1b 12.6kDa AW494148 FI      | -0.6713715 | 2.16E-05   |
| NM_001178: Txnrd3 AI196535 TR2 Tgr - 6    | -0.6716908 | 2.04E-06   |
| NM_001099: Gm15093 ENSMUSG000000729       | -0.6720298 | 7.35E-05   |
| NM_001081: Tbccd1 5730478M09Rik AU01:     | -0.6722308 | 3.97E-07   |
| NM_001198: AB124611 Gm1706 - 9 A3 9 f     | -0.6737326 | 1.99E-06   |
| NM_053161 Mrpl27 A630055F16Rik D11M       | -0.6746056 | 2.36E-05   |
| NM_001163: Nqo2 NMO2 Nmor2 Ox2 - 13       | -0.6749315 | 2.09E-08   |
| NM_027724 Cage1 4933427I01Rik Ctag3 R     | -0.6750225 | 8.94E-05   |
| NM_001145: Arhgef33 Gm941 - 17 E3 17 f    | -0.6764579 | 9.87E-11   |
| NM_001110: Kcnj13 - - 1 D 1 protein-codir | -0.6785142 | 3.21E-07   |
| NM_025862 Acad8 2310016C19Rik AI7869:     | -0.6789693 | 2.43E-08   |

|           |                               |            |            |
|-----------|-------------------------------|------------|------------|
| NM_172853 | Cdh7 9330156F07Rik CDH7L1     | -0.6792298 | 4.62E-15   |
| NM_001048 | CerkI Gm1958 Rp26 RP23-335    | -0.6797005 | 0.00012454 |
| NM_026536 | Atp5s 1110015E18Rik ATPW -    | -0.6810925 | 6.50E-09   |
| NM_177409 | Tram2 C330003D03Rik - 1 A4    | -0.681381  | 1.96E-05   |
| NM_001166 | Zfp882 ENSMUSG00000052439     | -0.684569  | 4.29E-06   |
| NM_029249 | Parpbp 4930547N16Rik AI5036   | -0.6848047 | 0.00012454 |
| NM_023719 | Txnip 1200008J08Rik AA68210   | -0.6867888 | 2.50E-07   |
| NM_145615 | EtfA 2010200I21Rik D9ErtD394  | -0.6881953 | 6.15E-12   |
| NM_175643 | Adamts2 ADAM-TS2 ADAMTS-      | -0.6883915 | 1.79E-11   |
| NM_027934 | Rnf180 3110001E11Rik Rines    | -0.6885621 | 4.42E-27   |
| NM_177460 | Parp16 ARTD15 BC055447 C7     | -0.6889259 | 7.11E-07   |
| NM_007533 | Bckdha - - 7 A3 7 protein-cod | -0.6905101 | 4.56E-06   |
| NM_018766 | Ntsr1 NT-1R NTR-1 NTR1 RP2    | -0.6905888 | 8.78E-17   |
| NM_001198 | Ccpg1os EG546143 Gm5918 -     | -0.6906791 | 0.00064545 |
| NM_172255 | Wdr11 2900055P10Rik AW489     | -0.6927164 | 1.43E-13   |
| NM_013843 | Zfp53 D030067O06Rik KRAZ1     | -0.6933273 | 8.71E-11   |
| NM_001034 | Armc2 2610018I05Rik - 10 B2   | -0.6935963 | 1.62E-13   |
| NM_016870 | AcsM3 Sa Sah - 7 7 F3 protei  | -0.6939691 | 0.00041647 |
| NM_001013 | Ercc6l2 0610007P08Rik 17000   | -0.694589  | 3.97E-17   |
| NM_001277 | Tdrd5 Gm103 - 1 G3 1 protei   | -0.6963829 | 1.26E-06   |
| NM_013792 | Naglu - - 11 D 11 protein-cod | -0.6970446 | 0.00053724 |
| NM_181540 | Tm6sf2 - - 8 B3.3 8 protein-c | -0.6973401 | 0.00016562 |
| NR_045741 | Gm10432 ENSMUSG000000728      | -0.6974017 | 0.0001248  |
| NM_181414 | Pik3c3 5330434F23Rik Vps34    | -0.6977053 | 4.50E-15   |
| NM_001141 | Bean1 Bean mCG_21548 8 D1     | -0.6996696 | 5.21E-15   |
| NM_001272 | Ada - RP23-144O20.2 2 H3 2    | -0.7000101 | 7.35E-05   |
| NM_173376 | Rbmx2 2700089A17Rik 28104     | -0.7002372 | 0.00046146 |
| NM_001127 | Gm1564 Gm663 RP23-57F11.6     | -0.7002805 | 0.00077827 |
| NM_023873 | Cep70 6720484E09Rik Bite C0   | -0.7012812 | 1.80E-19   |
| NM_178925 | Nsun3 6720484A09Rik AU022     | -0.7019866 | 9.95E-09   |
| NM_001033 | Gal3st4 1500031A01Rik - 5 G2  | -0.702039  | 1.76E-05   |
| NM_001205 | Thsd1 4833423O18Rik Tmtsp     | -0.702117  | 2.30E-05   |
| NM_009928 | Col15a1 - RP23-119F15.1 4 4   | -0.7027354 | 1.44E-09   |
| NM_010077 | Drd2 D2R Drd-2 - 9 A5.3 9 26  | -0.7028436 | 7.12E-06   |
| NM_019756 | Tubd1 4930550G19Rik Tubd R    | -0.7031379 | 1.58E-05   |
| NM_026063 | Uqcc2 2900010M23Rik M19 N     | -0.703484  | 3.74E-05   |
| NM_019922 | Crtap 5730529N23Rik CASP Le   | -0.7035538 | 0.00059965 |
| NM_011758 | Zfp39 CTfin33 RP23-419P16.1C  | -0.7040103 | 1.38E-07   |
| NM_023483 | 1110032A03Rik 4930500N06Ri    | -0.7045405 | 3.24E-05   |
| NM_001247 | Lcp1 AW536232 D14ErtD310e     | -0.70459   | 0.00022956 |
| NM_001172 | Wdr17 3010002I12Rik B23020    | -0.7051808 | 2.41E-24   |
| NM_029553 | Ttc8 0610012F22Rik AV00144    | -0.7054265 | 7.90E-19   |

|           |                              |            |            |
|-----------|------------------------------|------------|------------|
| NM_001166 | Zfp712 4921504N20Rik mszf31  | -0.7061474 | 7.97E-09   |
| NM_001276 | Gpr155 1110017O10Rik DEPD    | -0.7087774 | 1.16E-14   |
| NM_008437 | Napsa KAP Kdap NAP1 SNAP     | -0.7090377 | 7.51E-05   |
| NR_040765 | B230323A14Rik - 9 9 ncRNA    | -0.7110982 | 0.00074159 |
| NR_029381 | 5330413P13Rik - 9 9 ncRNA    | -0.7113849 | 0.00042777 |
| NM_025681 | Lix1 5730466L18Rik - 17 17 A | -0.711874  | 4.51E-23   |
| NM_001199 | 4931406C07Rik - 9 9 A3 pro   | -0.7128474 | 2.69E-12   |
| NR_045308 | 2700089I24Rik - 19 D3 19 n   | -0.7130358 | 0.00084291 |
| NM_028370 | Pot1b 2810458H16Rik - 17 C   | -0.7138869 | 3.32E-10   |
| NM_027973 | Cenpu 1700029A22Rik Mlf1ip   | -0.7147512 | 0.00021279 |
| NM_172600 | Tmem260 5930435P15 67204     | -0.7174637 | 9.14E-21   |
| NM_001085 | Zfp467 1190001I08Rik AB0416  | -0.7175596 | 1.20E-06   |
| NM_025942 | Ola1 2510025G09Rik 2810405   | -0.718558  | 3.41E-30   |
| NM_008829 | Pgr 9930019P03Rik BB114106   | -0.7190212 | 2.04E-18   |
| NM_177829 | Spink10 A230091H23Rik - 18 f | -0.7223984 | 1.66E-23   |
| NM_024444 | Cyp4f18 1810054N16Rik Cyp4f  | -0.7233791 | 0.00088609 |
| NM_173431 | Rpgrip1l 1700047E16Rik 49314 | -0.7240717 | 2.47E-21   |
| NM_025676 | Mcm8 5730432L01Rik RP23-7    | -0.7251805 | 5.74E-05   |
| NM_001177 | Aamdc 1810020D17Rik 18100    | -0.7257383 | 1.17E-10   |
| NM_025798 | Hint3 0610010I17Rik AV00901  | -0.7289484 | 3.86E-08   |
| NM_145937 | Sumf1 AA543204 AI463102 AI   | -0.7306861 | 7.83E-16   |
| NM_134130 | Abhd3 AA675331 LABH3 - 18    | -0.7318142 | 6.67E-08   |
| NM_023556 | Mvk 2310010A05Rik AI256848   | -0.7351975 | 2.77E-10   |
| NM_026740 | Slc46a1 1110002C08Rik D11Er  | -0.7359947 | 1.27E-05   |
| NM_028270 | Aldh1b1 2700007F14Rik RP23-  | -0.7366944 | 0.00054753 |
| NM_001243 | Ncmap A330049M08Rik AA54     | -0.7366944 | 0.00054753 |
| NM_001146 | Wdfy4 Gm18810 - 14 B 14 pr   | -0.7372428 | 4.50E-05   |
| NM_145568 | Krcc1 AA792894 - 6 C1 6 prot | -0.7373465 | 2.53E-13   |
| NM_175128 | 4930430F08Rik 4930571E09Rik  | -0.737713  | 4.69E-08   |
| NM_029019 | Stard6 1700011K09Rik 483342  | -0.7385467 | 5.94E-05   |
| NM_001122 | Ccdc53 2900091E11Rik 57304   | -0.7393567 | 9.62E-12   |
| NM_010778 | Cd46 Mcp - 1 H6 1 98.41 cM   | -0.7409962 | 5.61E-26   |
| NM_011517 | Sycp3 Cor1 Scp3 - 10 10 C pr | -0.7452091 | 1.13E-10   |
| NM_181584 | Gab3 5930433H21Rik RP23-18   | -0.7462353 | 3.58E-10   |
| NM_001007 | Zdhhc23 Gm1751 Gm779 nidc    | -0.7463991 | 1.68E-05   |
| NM_173731 | Hmgcll1 BC037381 - 9 D 9 pri | -0.7465946 | 3.54E-24   |
| NM_029554 | 0610040J01Rik AI662686 - 5 C | -0.7479289 | 1.12E-22   |
| NM_133931 | Pot1a 1500031H18Rik AI8511   | -0.7491118 | 3.92E-12   |
| NM_016851 | Irf6 AI876454 E230028I05Rik  | -0.7508872 | 0.00076364 |
| NM_008005 | Fgf18 D130055P09Rik FGF-18   | -0.7512643 | 2.50E-06   |
| NM_026213 | Ttc33 2410099M07Rik 290000   | -0.7559701 | 2.22E-10   |
| NM_145549 | Efcab7 mKIAA1799 RP24-156I2  | -0.7593456 | 4.61E-13   |

|                                          |            |            |
|------------------------------------------|------------|------------|
| NM_001081: Tmem28 EG620592 Fam155b       | -0.7600682 | 2.79E-05   |
| NM_172492 Lrtm2 A230084J22 Al841794 -    | -0.7643513 | 0.00082096 |
| NM_001033: Plk1s1 Gm114 Ncrna00153 RP    | -0.7646    | 2.58E-10   |
| NM_007582 Cacng1 - RP23-338K8.4 11 E1    | -0.7672367 | 0.00077529 |
| NM_016719 Grb14 Al505286 RP23-308K19.    | -0.769579  | 5.83E-27   |
| NR_040375 B130034C11Rik - - 16 C3.3 16   | -0.771442  | 0.00017907 |
| NM_009779 C3ar1 AZ3B C3AR HNFAG09 -      | -0.7728419 | 0.00037999 |
| NM_001013: Lipo1 Al747699 - 19 C1 19 pr  | -0.7729091 | 6.75E-05   |
| NM_009523 Wnt4 Wnt-4 RP23-246F18.1 4     | -0.7735407 | 7.80E-05   |
| NM_027212 Med30 1810038N03Rik 25100.     | -0.7758063 | 8.90E-05   |
| NM_026038 L3hypdh 2810055F11Rik RP23-    | -0.7762096 | 2.40E-06   |
| NM_001042: Mterf1b ENSMUSG0000005317     | -0.7773367 | 5.59E-05   |
| NM_172491 D130040H23Rik - - 8 B3.3 8 p   | -0.7823565 | 1.63E-17   |
| NM_001159: Itgb6 2210409C20Rik 4831415   | -0.7914645 | 0.00051668 |
| NM_030189 Stpg1 4930403G18Rik 493055!    | -0.7948681 | 0.0009132  |
| NM_027760 Rassf8 5133400D11Rik AA8158    | -0.7967874 | 8.49E-05   |
| NR_046036 4933405D12Rik - - 3 3 ncRNA    | -0.7967874 | 8.49E-05   |
| NM_001134: Gm16532 - - 7 A1 7 protein-c  | -0.7973246 | 0.00023901 |
| NM_001165: Trim45 4921530N01Rik DN-35    | -0.7980559 | 2.34E-07   |
| NM_009115 S100b Al850290 Bpb - - 10 C1   | -0.7988018 | 4.86E-08   |
| NM_133711 Spata4 1700001N01Rik Srg2 T    | -0.799436  | 9.72E-05   |
| NM_153137 Traf3ip3 6030423D04Rik Al115   | -0.8010169 | 0.00011204 |
| NM_001145: 6430550D23Rik RP23-220D12.:   | -0.8027718 | 0.00048476 |
| NM_001199: Zfp94 - - 7 A3 7 10.27 cM pro | -0.8037681 | 6.27E-09   |
| NM_177882 Zfp786 A730012O14Rik Znf786    | -0.805619  | 6.12E-10   |
| NM_001252: Mett120 4833442J19Rik Al256:  | -0.8101042 | 1.19E-11   |
| NR_102341 4921504A21Rik - - 5 A3 5 ncF   | -0.8132449 | 0.00045621 |
| NM_024217 Cmtm3 9430096L06Rik Al4138     | -0.8142969 | 0.00045375 |
| NM_207245 Zfp870 Al173952 - - 17 B1 17 p | -0.8160362 | 3.12E-07   |
| NM_175241 1700028K03Rik - - 5 E5 5 pro   | -0.8220368 | 6.71E-12   |
| NR_001584 Speer8-ps1 4933405L09Rik SPI   | -0.8231481 | 0.00022598 |
| NM_028394 Hspb11 2900042B11Rik IFT25     | -0.8244342 | 2.29E-16   |
| NM_026158 Isoc2b 0610042E07Rik Al55338   | -0.8246263 | 5.63E-06   |
| NR_040508 Ccdc34os 1700024P03Rik - - 2   | -0.8249036 | 2.38E-11   |
| NM_028959 Cep72 2610029E11Rik 493344     | -0.8272307 | 4.32E-10   |
| NM_172928 Dclk3 BC056929 C730036H08      | -0.8292363 | 1.01E-08   |
| NM_177775 Esyt3 D930024E11 D9Ertd280e    | -0.8335362 | 1.54E-08   |
| NM_031378 Gsdmc Gsdmc1 Mlze - - 15 D1    | -0.8376443 | 0.00039803 |
| NM_001033: Sbspon Gm106 Rpesp - - 1 A3   | -0.8393355 | 4.87E-08   |
| NR_046004 4933406J10Rik A930009F24Rik    | -0.8396594 | 8.49E-05   |
| NM_027985 Mad2l2 2310033C13Rik MAD2      | -0.8403124 | 2.33E-07   |
| NM_001167: Gm4952 EG240549 - - 19 A 19   | -0.8435261 | 5.99E-05   |

|                                           |            |            |
|-------------------------------------------|------------|------------|
| NM_001256:4933402D24Rik - - 1 C2 1 prc    | -0.8438758 | 3.70E-05   |
| NM_009375 Tg Tgn cog - 15 D3-E 15 29.3    | -0.8447794 | 5.95E-28   |
| NM_001267:Kcnj12 IRK-2 IRK2 Kir2.2 MB-I   | -0.847919  | 4.30E-10   |
| NM_001177: Dcdc2c 1110015M06Rik - 12 A    | -0.8525163 | 4.85E-09   |
| NR_033304 Lypd6 E130115E03Rik RP23-34     | -0.854516  | 4.86E-12   |
| NM_173384 Sox30 - RP23-29H5.1 11 B1.1     | -0.8566152 | 1.13E-05   |
| NM_177028 Oacyl 5330437I02Rik AcyI3 - :   | -0.8600407 | 3.25E-15   |
| NR_046064 Gm10373 ENSMUSG00000072:        | -0.8618226 | 2.67E-07   |
| NM_172693 Galnt12 9130206E10 A630062      | -0.8623919 | 0.00015681 |
| NM_001048:Zfp455 3732412P20Rik Rslcan-    | -0.8658031 | 1.37E-07   |
| NM_025539 Nudt2 2310051L06Rik AA9399      | -0.8674907 | 1.92E-09   |
| NR_015567 A930007I19Rik - - 19 19 ncR     | -0.8703641 | 4.10E-09   |
| NM_029585 Det1 2610034H20Rik - 7 7 D2     | -0.8715051 | 2.32E-09   |
| NR_033522 1600029O15Rik - - 9 B 9 pse     | -0.8725758 | 2.12E-06   |
| NR_040409 Gm15441 ENSMUSG00000074:        | -0.873155  | 2.15E-15   |
| NM_001177: Nr1h3 AU018371 LXR RLD1 U      | -0.8738724 | 4.51E-06   |
| NM_172794 Zfp454 B230342N19 RP23-292      | -0.8753365 | 9.65E-06   |
| NR_045292 D630013N20Rik - - 10 10 ncR     | -0.8763044 | 1.57E-10   |
| NM_019566 Rhog 2810426G09Rik Arhg Sid     | -0.8764223 | 1.56E-05   |
| NM_020518 Vsig2 1190004B15Rik 2210413     | -0.8774499 | 4.32E-08   |
| NM_133667 Pdk2 - RP23-112C19.5 11 D 1:    | -0.8791887 | 0.00013383 |
| NM_024283 1500015O10Rik EcrG4 - 1 1 C1    | -0.8802772 | 1.72E-08   |
| NM_001045: AK129341 Kiaa1377 mKIAA137     | -0.8831611 | 2.97E-22   |
| NM_009848 Entpd1 2610206B08Rik AA408      | -0.8851983 | 1.21E-06   |
| NM_001099: Gm10230 ENSMUSG00000068:       | -0.8858373 | 1.60E-06   |
| NM_001102: Gm10096 ENSMUSG00000061:       | -0.8858373 | 1.60E-06   |
| NM_001109: Gm10486 ENSMUSG00000073:       | -0.8858373 | 1.60E-06   |
| NM_001099: Gm10147 ENSMUSG00000064:       | -0.8858373 | 1.60E-06   |
| NM_001109: Gm10058 ENSMUSG00000059:       | -0.8858373 | 1.60E-06   |
| NM_001110: Gm14819 OTTMUSG00000018:       | -0.8858373 | 1.60E-06   |
| NM_001100: Gm14632 OTTMUSG00000017:       | -0.8858373 | 1.60E-06   |
| NM_177578 Skint3 A430090E18Rik Skint-3    | -0.8895475 | 0.00017582 |
| NM_144856 Slc22a7 NLT OAT2 - 17 C 17      | -0.8935887 | 0.00072581 |
| NM_001081: 1700009P17Rik AV282292 Flat    | -0.8963969 | 0.00050598 |
| NM_001039: Ankrd37 - - 8 B1.1 8 protein-  | -0.8970398 | 2.42E-05   |
| NM_001029: Sla Slap Slap-1 - 15 D2 15 29. | -0.8988221 | 2.13E-24   |
| NM_029569 Asb5 1110018D09Rik - 8 8 B3     | -0.8998521 | 3.64E-11   |
| NM_028734 Steap2 4921538B17Rik AI9300     | -0.8999075 | 3.25E-09   |
| NM_025512 Zfand1 2310008M20Rik AW04       | -0.9091791 | 3.07E-11   |
| NM_008637 Nudt1 Mth1 - 5 5 G1 protein-    | -0.9102674 | 0.00018304 |
| NM_175176 4922501L14Rik 1700013E18Rik     | -0.9149394 | 0.00057342 |
| NR_027892 5430402O13Rik 3110047M22R       | -0.9152019 | 4.62E-18   |

|           |                                 |            |            |
|-----------|---------------------------------|------------|------------|
| NM_001136 | Ptger4 EP4 Ptgerep4 - 15 A1     | -0.9174258 | 0.00077356 |
| NR_030677 | BC025920 - - 10 C1 10 pseud     | -0.918001  | 0.00028272 |
| NM_001042 | Ccdc135 Gm770 SRG-L SRG-S       | -0.9197807 | 2.05E-05   |
| NR_033514 | 2310015A10Rik 5330419I17Rik     | -0.9200932 | 1.72E-06   |
| NM_031402 | Crispld1 Cocoacrisp Lcrisp1 - : | -0.9320715 | 5.52E-05   |
| NM_144801 | Tmem143 2310076O21Rik AI4       | -0.9391018 | 4.19E-12   |
| NM_001099 | Gm10488 ENSMUSG00000073:        | -0.940901  | 1.43E-05   |
| NR_033430 | Gm2694 - - 8 C3 8 ncRNA         | -0.9438145 | 8.80E-10   |
| NM_176996 | Smo E130215L21Rik Smoh bnl      | -0.948802  | 3.03E-18   |
| NR_045835 | A330041J22Rik - - 9 E3.1 9 nc   | -0.9494437 | 0.00013456 |
| NR_002452 | Nctc1 9530074L01 Rhit1 mCG      | -0.9504208 | 0.00053788 |
| NM_177706 | Gm4922 4933423E17 EG2373C       | -0.9524976 | 0.0001625  |
| NM_177869 | Fam185a 4631428I10 AI84767      | -0.9612654 | 1.45E-27   |
| NM_008628 | Msh2 AI788990 - - 17 E4 17 57   | -0.9672039 | 3.87E-18   |
| NM_001100 | Gm10487 ENSMUSG00000073:        | -0.9776347 | 2.63E-06   |
| NM_009529 | Gm4836 - - RP23-301E3.1 X A3.   | -0.9776347 | 2.63E-06   |
| NM_177382 | Cyp2r1 - - 7 F1 7 protein-codi  | -0.9798641 | 0.00016503 |
| NM_010008 | Cyp2j6 - - RP23-120E8.1 4 C5 4  | -0.9810257 | 4.81E-05   |
| NR_033459 | Zfp133-ps OTTMUSG00000003:      | -0.9894048 | 1.16E-06   |
| NM_028958 | Taf7I 4933438I11Rik 50kDa Ta    | -0.9894407 | 2.38E-06   |
| NM_001042 | Arrdc4 2410003C09Rik AV216:     | -0.9940262 | 5.94E-24   |
| NR_036590 | 1700001K23Rik - - 19 D2 19 r    | -0.9946811 | 8.66E-08   |
| NM_001252 | Zfp82 A030010D05 Krab16 M:      | -0.9955709 | 1.70E-16   |
| NM_172980 | Slc28a2 2010208B10Rik B4302     | -1.0055228 | 0.00048898 |
| NM_029859 | 4921530D09Rik Kiaa1984 RP2:     | -1.0278323 | 0.00044068 |
| NM_001252 | Catsper3 4921522D01Rik CACF     | -1.0345891 | 6.25E-06   |
| NM_206535 | Cd200r2 AY230198 Cd200r1I -     | -1.0355169 | 2.17E-06   |
| NR_045823 | Gm4890 A630049P17 - - 8 C2 8    | -1.0514465 | 2.03E-05   |
| NM_198302 | Rbm11 A330018F01 - - 16 C3.1    | -1.0572674 | 2.81E-05   |
| NM_053190 | S1pr5 Edg8 S1P5 lpB4 - - 9 A    | -1.0576155 | 0.00064927 |
| NM_198630 | 1810024B03Rik - - 2 F1 2 pro    | -1.0595995 | 1.56E-10   |
| NM_012034 | Tpsg1 Prss31 Tmt - - 17 A3.3 1  | -1.0647626 | 3.77E-05   |
| NM_029909 | C330018D20Rik AU018666 - - 1    | -1.0650928 | 6.33E-11   |
| NM_010172 | F7 AI132620 Cf7 FVII mfVII -    | -1.0701629 | 0.00075553 |
| NM_021429 | Hs1bp3 - - 12 A1.1 12 proteir   | -1.0760989 | 2.29E-19   |
| NM_146189 | Mybpc2 - - 7 B4 7 protein-coi   | -1.0894926 | 1.93E-06   |
| NM_027564 | 4921507P07Rik TISP74 - - 6 B    | -1.1287714 | 9.70E-16   |
| NM_053169 | Trim16 9130006M08Rik AI482      | -1.1355057 | 7.69E-05   |
| NR_040507 | 1700003L19Rik - - 16 16 ncRI    | -1.1744243 | 2.52E-08   |
| NR_040514 | 4930547E08Rik - - 2 2 ncRNA     | -1.1965524 | 0.00014639 |
| NM_016669 | Crym - - 7 F2 7 64.47 cM prot   | -1.2556205 | 4.97E-12   |
| NM_030188 | Ttc30a1 4930506L13Rik RP23:     | -1.2686658 | 0.00087033 |

|           |                                |            |            |
|-----------|--------------------------------|------------|------------|
| NM_001200 | (Pifo 1700027A23Rik mCG_500    | -1.2708839 | 1.29E-06   |
| NM_010216 | Figf AI325264 VEGF-D Vegfd f   | -1.2729577 | 6.04E-13   |
| NM_175471 | Cyb5rl 2810410C14Rik mFLJ00    | -1.2946033 | 0.00063497 |
| NM_021887 | Il21r NILR - 7 7 F4 protein-co | -1.3639591 | 0.00097935 |
| NM_007860 | Dio1 5DI D1 ITDI1 TXDI1 - 4    | -1.3667319 | 0.00011588 |
| NM_021285 | Myl1 AI325107 MLC1f MLC3f      | -1.3726456 | 0.00044526 |
| NR_004857 | Gm12060 OTTMUSG00000005:       | -1.3804641 | 0.00028023 |
| NM_001141 | Nkain4 AB030182 C030019F02     | -1.4077313 | 1.92E-13   |
| NM_027852 | Rarres2 0610007L05Rik AI303    | -1.4161186 | 6.01E-05   |
| NM_027132 | Otop3 2310011E08Rik RP23-1:    | -1.4201943 | 0.00081707 |
| NM_001162 | Mpst Mst - 15 E2 15 protein-   | -1.443283  | 9.34E-06   |
| NM_001142 | BC024139 6230424I18Rik - 15    | -1.4962364 | 1.22E-05   |
| NR_045472 | 1810007C17Rik - - 12 12 ncRl   | -1.5599184 | 2.91E-05   |
| NR_046171 | C230024C17Rik C230024C17 -     | -1.589076  | 0.00015547 |
| NM_013751 | Hrasls 2810012B06Rik A-C1 HI   | -1.6204864 | 3.69E-05   |
| NM_001039 | Kcnj10 BIR10 BIRK-1 Kir1.2 Kii | -1.6379343 | 0.00012118 |
| NM_007389 | Chrna1 AI385656 AI608266 Ac    | -1.7796804 | 1.79E-06   |
| NR_045174 | F730035M05Rik - - - ncRNA      | -1.7816345 | 0.00071232 |
| NM_026947 | Eci3 1810022C23Rik Kseg2 - 1   | -1.8731594 | 0.00093074 |
| NR_033486 | Gm17830 - - 17 C 17 25.05 cN   | -1.8731594 | 0.00093074 |
| NM_177591 | Igsf1 5330413N23 5530402E0:    | -2.5427023 | 0.000706   |
| NM_001013 | Lrrc52 4930413P14Rik - 1 H2.:  | -3.369464  | 0.00011188 |
| NM_001195 | (3425401B19Rik - - 14 B 14 pr  | -3.9791785 | 0.00041419 |
