# Supplementary material
Source: PubMed Central journal article supplement (PMC4486257)
Supplement: NIHMS686418-supplement-3.pdf [file NIHMS686418-supplement-3.pdf]

## RT-PCR Primers

| name    | forward               | reverse                |
|---------|-----------------------|------------------------|
| gapdh   | TTGATGGCAACAATCTCCAC  | CGTCCCGTAGACAAAATGGT   |
| 18S     | cgaacgtctgccctatcaact | ctgccttcttgatgtggt     |
| npas4   | TCTTGAGCAGAGAGAAGCC   | TGCACATCATGAGTCTTGCC   |
| egr1    | TGGGATAACTCGTCTCCACC  | GAGCGAACAACCTATGAGC    |
| bdnf    | GCCTTCATGCAACCGAAGTA  | TGAGTCTCCAGGACAGCAAA   |
| fos     | TGGCACTAGAGACGGACAGA  | TCCTACTACCATTCGCCAGC   |
| nr4a3   | GTCTCAGTGTCCGGATGGTT  | TAGTGGGCTCTTTGGTTTGG   |
| igf-1   | CACACTGACATGCCCAAGAC  | TTCTCCTTTGCAGCTTCGTT   |
| btg2    | CGACCCTGGCACTCTACTGT  | AGGTATACGGTGGCCTGTTG   |
| rara    | AAAGTCTACGTCCGGAAACG  | CAATGTGATCACCCGTTTCCAG |
| pcdh8   | ACCTCATCAACCACATGCAG  | AGCAGCGATCAGAATGACCT   |
| bdnf    | TGAGTCTCCAGGACAGCAAA  | GCCTTCATGCAACCGAAGTA   |
| nr4a2   | AGTCTGATCAGTGCCCTCGT  | ATAGTCAGGGTTTGCCTGGA   |
| junb    | CCATCAGCTACCTCCACAT   | TCCTCTTTAAAGGCGGAAGC   |
| egr4    | CTCCACCTGAGCGACTTCTC  | TCCAGGAAGCAGGAGTCTGT   |
| egr2    | TTGACCAGATGAACGGAGTG  | AGCTACTCGGATACGGGAGA   |
| gadd45g | ACCTGCATTGCATCCTCATT  | GCTCTCCTCGCAGAACAAC    |

## ChIP Primers

| name          | forward              | reverse              |
|---------------|----------------------|----------------------|
| Arc-enhancer  | ACCCCCAGAGCTGAGAGTTC | TGCAGAGAACAGCAGGAAAA |
| Fos-enhancer  | TCCACATGAGATACGCGAGA | GCCACTCCAGGTGGATAATG |
| Egr1-enhancer | AAGACCGTCCCCTCACAAAC | GCGCTTTCAGCAACCTAGAG |

## GRO-seq Primers

| Name    | Sequence 5' to 3'                                                                                                                                            |
|---------|--------------------------------------------------------------------------------------------------------------------------------------------------------------|
| oNTI223 | pGATCGTCGGACTGTAGAACTCT;CAAGCAGAAGACGGCATAACGATTTTTTTTTTTTTTTTTTTTTVN<br>p = 5' phosphorylation<br>";" = abasic dSpacer furan<br>VN = degenerate nucleotides |
| oNTI200 | CAAGCAGAAGACGGCATA                                                                                                                                           |
| oNTI201 | AATGATACGGCGACCACCGACAGGTTTCAGAGTCTACAGTCCGACG                                                                                                               |

## 4C-seq Primers

|                   |                                                                                               |
|-------------------|-----------------------------------------------------------------------------------------------|
| FOS first primer  | AAT GAT ACG GCG ACC ACC GAA CAC TCT TTC CCT ACA CGA CGC TCT TCC GAT CT TG GGGCTGATGTGGGCAAGCT |
| FOS second primer | CAA GCA GAA GAC GGC ATA CGACGTATTCAGACCCCCATCTCC                                              |

## CRISPR CLONING PRIMERS

| name          | sequence                                                        |
|---------------|-----------------------------------------------------------------|
| FOSe3-GD1-F   | ggagaaCCACCTTGTGGACGTCTATGCGTTTTAGCCAGTTTTAGAGCTAGAAATAGCAAGTT  |
| FOSe3-GD2-F   | ggagaaCCACCTTGTGGCGCCATCACGTGTGTGTCAGCGTTTTAGAGCTAGAAATAGCAAGTT |
| FOSe3-GD3-F   | ggagaaCCACCTTGTGGCGTTTTGCTCTGTCTCCAGTTTTAGAGCTAGAAATAGCAAGTT    |
| FOSe3-GD4-F   | ggagaaCCACCTTGTGGTCCGCCCTGGCGCAGAGGGTTTTAGAGCTAGAAATAGCAAGTT    |
| FOSe4-GD1-F   | ggagaaCCACCTTGTGGACGGCGCCTACGTGTCACCGGTTTTAGAGCTAGAAATAGCAAGTT  |
| FOSe4-GD2-F   | ggagaaCCACCTTGTGGGCGGGCAGACGTCACGGCGGTTTTAGAGCTAGAAATAGCAAGTT   |
| FOSe4-GD3-F   | ggagaaCCACCTTGTGGTGGTTTTCCACGGTGACACGTGTTTTAGAGCTAGAAATAGCAAGTT |
| FOSe4-GD4-F   | ggagaaCCACCTTGTGGCATAATTGGAAAAGCGCCGTTTTAGAGCTAGAAATAGCAAGTT    |
| BDNFe-GD1-F   | ggagaaCCACCTTGTGGCCCCAAGTATTCACGAGCAGTTTTAGAGCTAGAAATAGCAAGTT   |
| BDNFe-GD2-F   | ggagaaCCACCTTGTGGAAAGCCCTAGCAACTGTATTGTTTTAGAGCTAGAAATAGCAAGTT  |
| BDNFe-GD3-F   | ggagaaCCACCTTGTGGCTGTGACACAAATGGCAAGTTTTAGAGCTAGAAATAGCAAGTT    |
| BDNFe-GD4-F   | ggagaaCCACCTTGTGGTTAGACGAACGCTTCGTTAAGTTTTAGAGCTAGAAATAGCAAGTT  |
| NPAS4e-GD1-F  | ggagaaCCACCTTGTGGCGCGCGCTGGCGCCTTTTTAGTTTTAGAGCTAGAAATAGCAAGTT  |
| NPAS4e-GD2-F  | ggagaaCCACCTTGTGGGACAGAGTGGGGTGGCCCGGGTTTTAGAGCTAGAAATAGCAAGTT  |
| NPAS4e-GD3-F  | ggagaaCCACCTTGTGGTCCCTCGCAGCTCTCTCTCGGTTTTAGAGCTAGAAATAGCAAGTT  |
| NPAS4e-GD4-F  | ggagaaCCACCTTGTGGCTCCAGTCTTGCCTATTTGTTTTAGAGCTAGAAATAGCAAGTT    |
| NR4A1e-GD1-F  | ggagaaCCACCTTGTGGCGCGCCCATTTGACGTCTCGTTTTAGAGCTAGAAATAGCAAGTT   |
| NR4A1e-GD2-F  | ggagaaCCACCTTGTGGGGCTAAAAATAGCGCGCCGTTTTAGAGCTAGAAATAGCAAGTT    |
| NR4A1e-GD3-F  | ggagaaCCACCTTGTGGCCGACGCGCCTCATCAATGTTTTAGAGCTAGAAATAGCAAGTT    |
| NR4A1e-GD4-F  | ggagaaCCACCTTGTGGCGTGAGCGCTTTGGGAGGCGGTTTTAGAGCTAGAAATAGCAAGTT  |
| sgRNA reverse | ctagtaCTCGAGAAAAAAGCACCGACTCGGTGCCAC                            |
